# Supplementary material for: First‐Principles Studies on the Atomistic Properties of Metallic Magnesium as Anode Material in Magnesium‐Ion Batteries
Source: PubMed Central journal article supplement — ChemSusChem. 2022 May 18;15(14):e202200414. doi: 10.1002/cssc.202200414 (PMC9401065; doi:10.1002/cssc.202200414), 2022-05-18
Supplement: CSSC-15-0-s001.pdf [file CSSC-15-0-s001.pdf]

# ChemSusChem

Supporting Information

## **First-Principles Studies on the Atomistic Properties of Metallic Magnesium as Anode Material in Magnesium-Ion Batteries**

Florian Fiesinger, Daniel Gaissmaier, Matthias van den Borg, and Timo Jacob\*© 2022 The Authors. ChemSusChem published by Wiley-VCH GmbH. This is an open access article under the terms of the Creative Commons Attribution Non-Commercial NoDerivs License, which permits use and distribution in any medium, provided the original work is properly cited, the use is non-commercial and no modifications or adaptations are made.

## Table of Contents

|                                    |    |
|------------------------------------|----|
| <i>Theoretical section</i> .....   | 2  |
| <i>Bulk properties</i> .....       | 3  |
| <i>Surface properties</i> .....    | 5  |
| <i>Adsorption properties</i> ..... | 6  |
| <i>Diffusion properties</i> .....  | 9  |
| <i>References</i> .....            | 30 |

## Theoretical section

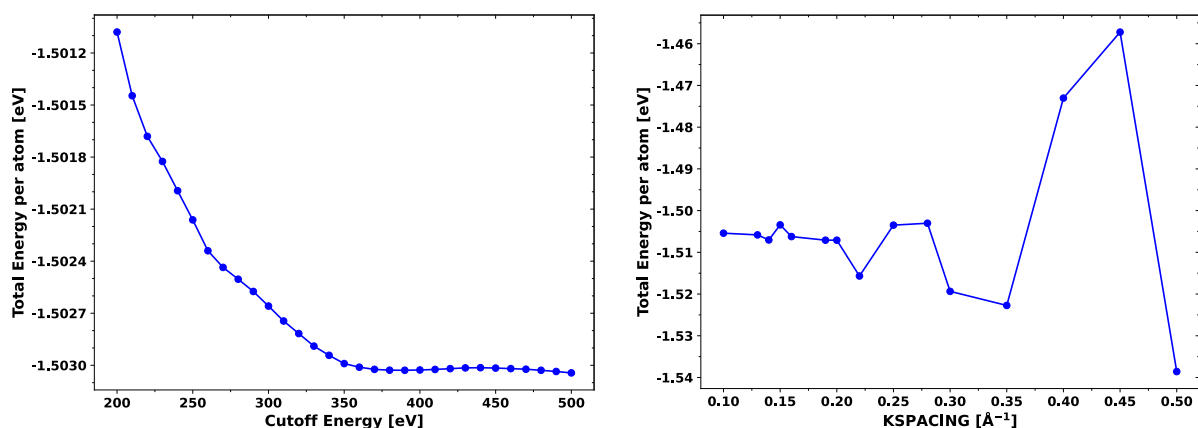

Figure S1. Convergence studies of the cutoff energy ( $\triangleq$  ENCUT Tag) and grid density of the k-points ( $\triangleq$  KSPACING Tag).

Table S1. Number of layers used for the calculation of surface energies.

| Surface                                  | Layers | Surface            | Layers |
|------------------------------------------|--------|--------------------|--------|
| Mg(0001)                                 | 7      | Mg(11 $\bar{2}$ 2) | 24     |
| Mg(10 $\bar{1}$ 0)A/ Mg(10 $\bar{1}$ 0)B | 12     | Mg(11 $\bar{2}$ 0) | 20     |
| Mg(10 $\bar{1}$ 1)                       | 14     | Mg(21 $\bar{3}$ 1) | 32     |
| Mg(10 $\bar{1}$ 2)A/ Mg(10 $\bar{1}$ 2)B | 18     | Mg(22 $\bar{4}$ 1) | 40     |
| Mg(21 $\bar{3}$ 0)A/ Mg(21 $\bar{3}$ 0)B | 30     | Mg(11 $\bar{2}$ 1) | 22     |
| Mg(21 $\bar{3}$ 2)                       | 32     | Mg(20 $\bar{2}$ 1) | 24     |

Table S2. Surface directions, number of layers and supercell used for the calculation of adsorption, dimer interaction, diffusion, and frequency properties. One layer consists of 2 Mg atoms for Mg(0001). The asterisk \* indicates the use of vicinal slabs.

| Surface            | Property/Process                                                                                            | Direction         | Layers | Supercell    |
|--------------------|-------------------------------------------------------------------------------------------------------------|-------------------|--------|--------------|
| Mg(0001)           | Adsorption, Dimer interaction                                                                               | [0001]            | 3      | 6 $\times$ 6 |
|                    | Terrace, Dimer, Trimer                                                                                      |                   |        |              |
|                    | Kink, Inner-corner, Outer-corner ([ $\bar{1}$ $\bar{1}$ $\bar{2}$ 0]-step)                                  | [10 $\bar{1}$ 6]* | 20     | 6 $\times$ 1 |
|                    | Kink, Inner-corner, Outer-corner ([11 $\bar{2}$ 0]-step)                                                    | [10 $\bar{1}$ 6]* | 20     | 6 $\times$ 1 |
|                    | Step-edge, Step-vacancy, Step-down, Step-down (dimer), Upper-step ([ $\bar{1}$ $\bar{1}$ $\bar{2}$ 0]-step) | [10 $\bar{1}$ 8]* | 26     | 4 $\times$ 1 |
|                    | Step-edge, Step-vacancy, Step-down, Step-down (dimer), Upper-step ([11 $\bar{2}$ 0]-step)                   | [10 $\bar{1}$ 8]* | 26     | 4 $\times$ 1 |
| Mg(10 $\bar{1}$ 0) | Adsorption, Dimer interaction                                                                               | [10 $\bar{1}$ 0]  | 6      | 6 $\times$ 3 |
|                    | Terrace                                                                                                     |                   |        |              |
| Mg(10 $\bar{1}$ 1) | Adsorption, Dimer interaction                                                                               | [10 $\bar{1}$ 1]  | 6      | 6 $\times$ 3 |
|                    | Terrace, Dimer, Trimer                                                                                      |                   |        |              |
|                    | Step-edge, Step-down ([ $\bar{1}$ $\bar{2}$ $\bar{1}$ 0]A/B-step)                                           | [30 $\bar{3}$ 2]* | 18     | 5 $\times$ 1 |
|                    | Step-edge, Step-down ([1 $\bar{2}$ 10]A/B-step)                                                             | [30 $\bar{3}$ 4]* | 21     | 5 $\times$ 1 |
|                    | Step-edge, Step-down ([10 $\bar{1}$ 2]-step)                                                                | [5 $\bar{1}$ 65]* | 34     | 3 $\times$ 1 |

## Bulk properties

The bulk properties of magnesium, including lattice constants, binding energies, and bulk moduli, were calculated for the following crystal structures with the PBE and the BEEF-vdW functional: hexagonal-closed-packed (*hcp*), double-hexagonal-closed-packed (*dhcp*), body-centered-cubic (*bcc*), face-centered-cubic (*fcc*), simple cubic (*sc*),  $\beta$ -tungsten (*a15*) and diamond (*dia*). The calculated values for both functionals for all crystal structures and a comparison with experimentally obtained data are shown in Table S3. Magnesium crystallizes in accordance with experimental studies in a *hcp* structure under ambient conditions. The calculated cohesive energy of  $1.50 \text{ eV}\cdot\text{atom}^{-1}$  (Equation (S1)) from the PBE functional is in almost perfect agreement with the experimental value (Table S3) and with other theoretical studies (Table S4). The BEEF-vdW functional slightly underestimates the cohesive energy, but it is within its estimated error. Moriarty *et al.* first predicted a phase transformation from the *hcp* to the *bcc* structure at around 50 GPa from generalized pseudopotential theory<sup>[1-3]</sup>, which Olijnyk and Holzapfel later confirmed by X-ray diffraction (XRD).<sup>[4]</sup> This is contradicted by the study of Erandonea *et al.*, who assumed the *dhcp* instead of the *bcc* structure at high pressures and temperatures.<sup>[5]</sup> Moriarty *et al.* also predicted a second phase transformation from the *bcc* to the *fcc* structure at even higher pressures<sup>[2]</sup>, which could not be observed experimentally.<sup>[6]</sup>

**Table S3.** Calculated and experimentally observed physical constants for different bulk phases of magnesium. The lattice constants  $a_0$  and  $c_0$  are given in Å, bulk moduli  $B_0$  in GPa, and the cohesive energy  $E_{\text{coh}}$  (Equation (S1)) in  $\text{eV}\cdot\text{atom}^{-1}$ . For the BEEF-vdW functional, the calculated standard deviation of the cohesive energy is given in parenthesis. The experimental results were taken from Kittel *et al.*<sup>[7]</sup> The influence of the zero-point vibrational energy  $E_{\text{ZPVE}}$  on the experimental values is given in parentheses. The values were adapted from Alchagirov *et al.* for  $a_0$ ,  $c_0$ , and  $B_0$  and calculated with Equation (S2) for  $E_{\text{coh}}$ .<sup>[8]</sup>

| Bulk properties |                  | This work |             | Other works  |
|-----------------|------------------|-----------|-------------|--------------|
|                 |                  | PBE       | BEEF-vdW    | Experiment   |
| <i>hcp</i>      | $a_0$            | 3.18      | 3.19        | 3.21 (0.00)  |
|                 | $c_0$            | 5.21      | 5.21        | 5.21 (0.00)  |
|                 | $B_0$            | 36.5      | 37.1        | 35.4 (-0.04) |
|                 | $E_{\text{coh}}$ | 1.50      | 1.33 (0.27) | 1.51 (0.04)  |
| <i>dhcp</i>     | $a_0$            | 3.19      | 3.18        |              |
|                 | $c_0$            | 10.43     | 10.43       |              |
|                 | $B_0$            | 36.1      | 36.7        |              |
|                 | $E_{\text{coh}}$ | 1.49      | 1.33        |              |
| <i>bcc</i>      | $a_0$            | 3.57      | 3.58        |              |
|                 | $B_0$            | 35.3      | 35.4        |              |
|                 | $E_{\text{coh}}$ | 1.48      | 1.30 (0.28) |              |
| <i>fcc</i>      | $a_0$            | 4.52      | 4.52        |              |
|                 | $B_0$            | 35.9      | 36.66       |              |
|                 | $E_{\text{coh}}$ | 1.49      | 1.32 (0.27) |              |
| <i>sc</i>       | $a_0$            | 3.02      | 3.02        |              |
|                 | $B_0$            | 23.2      | 23.2        |              |
|                 | $E_{\text{coh}}$ | 1.12      | 0.94 (0.22) |              |
| <i>a15</i>      | $a_0$            | 5.72      | 5.72        |              |
|                 | $B_0$            | 34.7      | 35.1        |              |

|            |                  |      |             |  |
|------------|------------------|------|-------------|--|
|            | $E_{\text{coh}}$ | 1.46 | 1.28 (0.27) |  |
| <i>dia</i> | $a_0$            | 6.85 | 6.97        |  |
|            | $B_0$            | 10.9 | 9.1         |  |
|            | $E_{\text{coh}}$ | 0.73 | 0.56 (0.11) |  |

**Table S4. Calculated (PBE/BEEF-vdW) and literature physical constants of the *hcp* bulk phase of magnesium. The lattice constants  $a_0$  and  $c_0$  are given in Å, bulk moduli  $B_0$  in GPa and the cohesive energy  $E_{\text{coh}}$  in eV·atom<sup>-1</sup>.**

| Bulk properties           |                      | $a_0$ | $c_0$ | $B_0$ | $E_{\text{coh}}$ | Code             |
|---------------------------|----------------------|-------|-------|-------|------------------|------------------|
| This work                 | PBE                  | 3.18  | 5.21  | 36.5  | 1.50             | VASP             |
|                           | BEEF-vdW             | 3.19  | 5.21  | 37.1  | 1.33             | VASP             |
| Other works               | PBE <sup>[9]</sup>   | 3.19  | 5.18  | -     | 1.51             | VASP             |
|                           | PBE <sup>[10]</sup>  | 3.19  | 5.18  | -     | 1.50             | VASP             |
|                           | PBE <sup>[11]</sup>  | 3.22  | 5.12  | -     | 1.50             | VASP             |
|                           | PW91 <sup>[12]</sup> | 3.21  | 5.16  | 35.5  | 1.45             | Quantum Espresso |
|                           | PBE <sup>[12]</sup>  | 3.20  | 5.20  | -     | 1.50             | VASP             |
|                           | PW91 <sup>[13]</sup> | 3.18  | 5.14  | 35.5  | 1.50             | fhi96md          |
|                           | PBE <sup>[14]</sup>  | 3.19  | 5.18  | -     | -                | VASP             |
|                           | LDA <sup>[14]</sup>  | 3.12  | 5.08  | -     | -                | VASP             |
|                           | PBE <sup>[15]</sup>  | 3.19  | 5.22  | -     | -                | VASP             |
|                           | PW91 <sup>[15]</sup> | 3.19  | 5.20  | -     | -                | VASP             |
|                           | PBE <sup>[16]</sup>  | 3.19  | 5.18  | -     | -                | VASP             |
| Experiment <sup>[7]</sup> | 3.21                 | 5.21  | 35.6  | 1.51  |                  |                  |

The cohesive energy  $E_{\text{coh}}$  is defined as the energy gain an isolated atom receives when it is embedded in a certain crystal structure. It was calculated by subtracting the energies of the isolated atoms  $E_{\text{atom}}$  from the energy of the bulk crystal structure  $E_{\text{bulk}}$ , divided by the total number of atoms  $N$  in the bulk structure:

$$E_{\text{coh}} = -\frac{1}{N}(E_{\text{bulk}} - N \cdot E_{\text{atom}}) \quad (\text{S1})$$

Bulk moduli were calculated based on the jellium equation of state.<sup>[17]</sup> In order to be able to compare the theoretical cohesive energy with the experimental reference, the zero-point vibrational energy  $E_{\text{ZPVE}}$  was estimated as follows:<sup>[8]</sup>

$$E_{\text{ZPVE}} = \frac{9}{8}k_{\text{B}}\theta_{\text{D}} \quad (\text{S2})$$

$k_{\text{B}}$  corresponds to the Boltzmann constant and  $\theta_{\text{D}}$  to the Debye temperature, which is 400 K for magnesium.<sup>[8]</sup>

## Surface properties

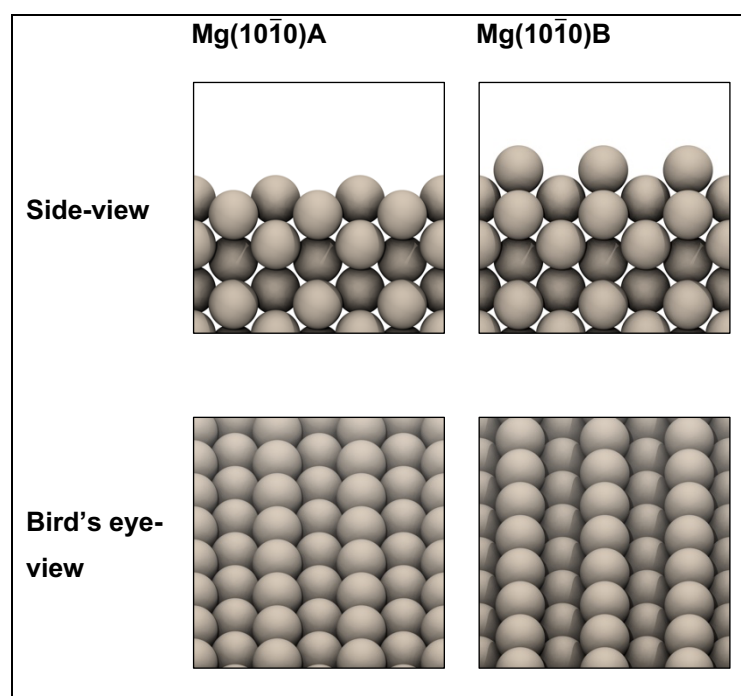

Figure S2. Representation of the surface terminations A and B of surface Mg(10 $\bar{1}0$ ). The respective structures are shown in a side- and a bird's eye-view.

Table S5. Calculated (PBE/BEEF-vdW) and literature surface energies  $\gamma$  for low- and high-index surfaces of magnesium. The surface energy  $\gamma$  is given in meV $\cdot\text{\AA}^{-2}$ . For the BEEF-vdW functional the calculated standard deviation of the surface energy is given in parenthesis.

| $\gamma$            | This work |           | Other works                                                                                                        |                                                |                      |                      |
|---------------------|-----------|-----------|--------------------------------------------------------------------------------------------------------------------|------------------------------------------------|----------------------|----------------------|
|                     | PBE       | BEEF-vdW  | PBE                                                                                                                | PBEsol                                         | EAM                  | Experiment           |
| Mg(0001)            | 33.9      | 38.7 (9)  | 34.6 <sup>[9]</sup> , 32.5 <sup>[10]</sup> , 32.5 <sup>[11]</sup> ,<br>33.0 <sup>[14]</sup> , 31.8 <sup>[18]</sup> | 39.0 <sup>[15]</sup> ,<br>35.0 <sup>[16]</sup> | 31.0 <sup>[19]</sup> | 51.0 <sup>[20]</sup> |
| Mg(10 $\bar{1}0$ )A | 40.2      | 44.9 (9)  | 39.9 <sup>[9]</sup> , 40.1 <sup>[14]</sup> , 37.4 <sup>[18]</sup>                                                  |                                                | 32.0 <sup>[19]</sup> |                      |
| Mg(10 $\bar{1}1$ )  | 40.9      | 45.8 (8)  | 40.9 <sup>[9]</sup> , 46.4 <sup>[14]</sup> , 39.3 <sup>[18]</sup>                                                  | 45.9 <sup>[15]</sup> ,<br>51.2 <sup>[16]</sup> | 31.1 <sup>[19]</sup> |                      |
| Mg(10 $\bar{1}2$ )A | 44.9      | 49.6 (10) | 38.4 <sup>[14]</sup> , 43.7 <sup>[18]</sup>                                                                        |                                                |                      |                      |
| Mg(21 $\bar{3}0$ )A | 45.9      | 50.6 (10) | 46.6 <sup>[14]</sup> , 43.7 <sup>[18]</sup>                                                                        |                                                |                      |                      |
| Mg(10 $\bar{1}2$ )B | 46.1      | 50.9 (10) |                                                                                                                    |                                                |                      |                      |
| Mg(21 $\bar{3}2$ )  | 46.7      | 51.3 (10) | 46.2 <sup>[18]</sup>                                                                                               |                                                |                      |                      |
| Mg(11 $\bar{2}2$ )  | 46.8      | 51.3 (10) | 48.4 <sup>[14]</sup> , 46.2 <sup>[18]</sup>                                                                        |                                                |                      |                      |
| Mg(11 $\bar{2}0$ )  | 47.1      | 51.7 (10) | 45.7 <sup>[9]</sup> , 44.9 <sup>[18]</sup>                                                                         | 51.4 <sup>[15]</sup> ,<br>34.3 <sup>[16]</sup> |                      |                      |
| Mg(21 $\bar{3}1$ )  | 47.1      | 51.7 (10) | 45.6 <sup>[18]</sup>                                                                                               |                                                |                      |                      |
| Mg(22 $\bar{4}1$ )  | 47.9      | 52.5 (10) | 46.8 <sup>[18]</sup>                                                                                               |                                                |                      |                      |
| Mg(11 $\bar{2}1$ )  | 48.7      | 53.0 (10) | 48.1 <sup>[9]</sup> , 47.7 <sup>[14]</sup> , 47.4 <sup>[18]</sup>                                                  |                                                |                      |                      |
| Mg(20 $\bar{2}1$ )  | 48.8      | 53.4 (10) | 48.1 <sup>[18]</sup>                                                                                               |                                                |                      |                      |
| Mg(21 $\bar{3}0$ )B | 52.0      | 56.3 (11) |                                                                                                                    | 56.1 <sup>[15]</sup>                           |                      |                      |
| Mg(10 $\bar{1}0$ )B | 55.5      | 59.4 (11) | 53.7 <sup>[11]</sup>                                                                                               | 60.6 <sup>[15]</sup> ,<br>38.5 <sup>[16]</sup> |                      |                      |

## Adsorption properties

The adsorption energy provides information about which positions are preferentially populated. Consequently, adsorption of Mg was studied on the surfaces present according to the Wulff shape (Mg(0001), Mg(10 $\bar{1}$ 0)A, Mg(10 $\bar{1}$ 1)) as well as, for the sake of completeness, on Mg(10 $\bar{1}$ 0)B. The respective adsorption energies (PBE/BEEF-vdW) and available literature data (PBE) are summarized in Table S6. In addition, a schematic representation of all adsorption sites studied is provided in Figure S3.

The highest energy gain results from adsorption on the *bridge-bottom* position on Mg(10 $\bar{1}$ 0)B (-1.64 eV), which is also the only stable adsorption site on this surface. The high adsorption energy seems logical since Mg(10 $\bar{1}$ 0)B, the surface termination with the highest surface energy, aims for its stabilization by a transformation into the much more stable counterpart Mg(10 $\bar{1}$ 0)A. In fact, this becomes even more evident when comparing the structural environments of the adsorption sites in Figure S3. Mg(10 $\bar{1}$ 0)B is characterized by deep channels running parallel. Adsorption at the *bridge-bottom* position coordinates the adsorbate to six adjacent neighbors, more than in any other site, regardless of the surface. The second highest adsorption energy was found for Mg(10 $\bar{1}$ 0)A at the *ontop-bottom* site (-1.00 eV), significantly lower than on Mg(10 $\bar{1}$ 0)B. Mg(10 $\bar{1}$ 0)A also exhibits channels, although they are not as deep as in Mg(10 $\bar{1}$ 0)B, and the number of coordination partners of an adsorbate is reduced to five. Following closely behind with a 0.03 eV lower adsorption energy (-0.97 eV) is the *hollow* site on Mg(10 $\bar{1}$ 1), where the adsorbate has a coordination number of four. These two sites have the highest adsorption energies for the surfaces present in the Wulff shape, indicating primary adsorption to occur on Mg(10 $\bar{1}$ 0)A and Mg(10 $\bar{1}$ 1).

There are two stable adsorption sites in the case of the most stable surface Mg(0001). Preferred adsorption occurs at the *fcc* site (-0.58 eV), which is energetically slightly favored compared to the *hcp* site (-0.56 eV). Thus, both adsorption energies are approximately 40% lower than the corresponding adsorption energies on Mg(10 $\bar{1}$ 0)A and Mg(10 $\bar{1}$ 1). Clarification may be found again by considering the morphology. Mg(0001) has a flat surface with a high packaging density. The coordination of the adsorbate occurs only to three surface atoms. Moreover, the energetically similar but unstable *bridge* site already allows the prediction of a low terrace self-diffusion barrier. At this point, we refer to the work of Lautar *et al.* in which potential energy surfaces (PES) were calculated, clearly showing the varying energy landscapes for Mg(0001), Mg(10 $\bar{1}$ 0)A, and Mg(10 $\bar{1}$ 1).<sup>[9]</sup> We also want to reference two EAM potentials for magnesium by Liu *et al.*<sup>[21]</sup> and Sun *et al.*<sup>[22]</sup> However, in the potential of Liu *et al.*, only the *bridge* position on Mg(0001) is stable, which is not the case according to our DFT calculations.<sup>[19]</sup> We also want to point to the section Dimer and trimer self-diffusion on Mg(0001) and Mg(10 $\bar{1}$ 1), which further clarifies why *fcc* sites are energetically favored over *hcp* sites, although this contradicts the nature of the *hcp* lattice, which should follow the ABABAB-stacking sequence.

All calculated adsorption energies are consistent with previously published theoretical results (on PBE level).<sup>[9,10,12,23]</sup> The error range for the BEEF-vdW functional varies between 0.10 and 0.31 eV, indicating a strong dependence on the chosen functional. However, all PBE results are within the BEEF-vdW standard deviation, and the energy ratios are equal for both functionals.

**Table S6.** The adsorption energies  $E_{ad}$  of an adsorbed Mg atom on Mg(0001), Mg(10 $\bar{1}$ 0) and Mg(10 $\bar{1}$ 1) calculated with Equation (S3) (PBE and BEEF-vdW) and literature data. All values are given in eV·atom<sup>-1</sup>. For the BEEF-vdW functional, the calculated standard deviation of the adsorption energy  $E_{ad}$  is given in parenthesis. A schematic representation of all adsorption sites studied is given in Figure S3.

| $E_{ad}$                            | Adsorption site              | This work |              | Other works                                     |
|-------------------------------------|------------------------------|-----------|--------------|-------------------------------------------------|
|                                     |                              | PBE       | BEEF-vdW     | PBE                                             |
| <b>Mg(0001)</b>                     | fcc                          | -0.58     | -0.48 (0.15) | -0.58 <sup>[9]</sup> ,<br>-0.59 <sup>[10]</sup> |
|                                     | hcp                          | -0.56     | -0.47 (0.14) | -0.56 <sup>[9]</sup> ,<br>-0.57 <sup>[10]</sup> |
|                                     | bridge <sup>[a]</sup>        | -0.56     | -0.46 (0.14) | -0.57 <sup>[10]</sup>                           |
|                                     | ontop <sup>[a]</sup>         | -0.45     | -0.38 (0.12) | -0.44 <sup>[10]</sup>                           |
| <b>Mg(10<math>\bar{1}</math>0)A</b> | ontop-bottom                 | -1.00     | -0.86 (0.23) | -1.03 <sup>[9]</sup>                            |
|                                     | bridge-bottom <sup>[a]</sup> | -0.97     | -0.84 (0.21) |                                                 |
|                                     | ontop-up <sup>[a]</sup>      | -0.46     | -0.42 (0.10) |                                                 |
|                                     | bridge-up <sup>[a]</sup>     | -0.58     | -0.51 (0.12) |                                                 |
| <b>Mg(10<math>\bar{1}</math>0)B</b> | ontop-bottom <sup>[a]</sup>  | -1.23     | -1.04 (0.25) |                                                 |
|                                     | bridge-bottom                | -1.64     | -1.45 (0.31) |                                                 |
|                                     | ontop-up <sup>[a]</sup>      | -0.42     | -0.38 (0.10) |                                                 |
|                                     | bridge-up <sup>[a]</sup>     | -0.52     | -0.50 (0.12) |                                                 |
| <b>Mg(10<math>\bar{1}</math>1)</b>  | hollow                       | -0.97     | -0.83 (0.19) | -0.97 <sup>[9]</sup>                            |

[a] unstable configuration; fixed with constraints.

Adsorption energies  $E_{ad}$  were obtained by subtracting the energy of the pure surface  $E_{slab}$  plus the energy of an isolated magnesium atom  $E_{Mg-atom}$  from the energy of the relaxed system  $E_{tot}$  containing the slab with the adsorbed atom:

$$E_{ad} = E_{tot} - (E_{slab} + E_{Mg-atom}) \quad (S3)$$



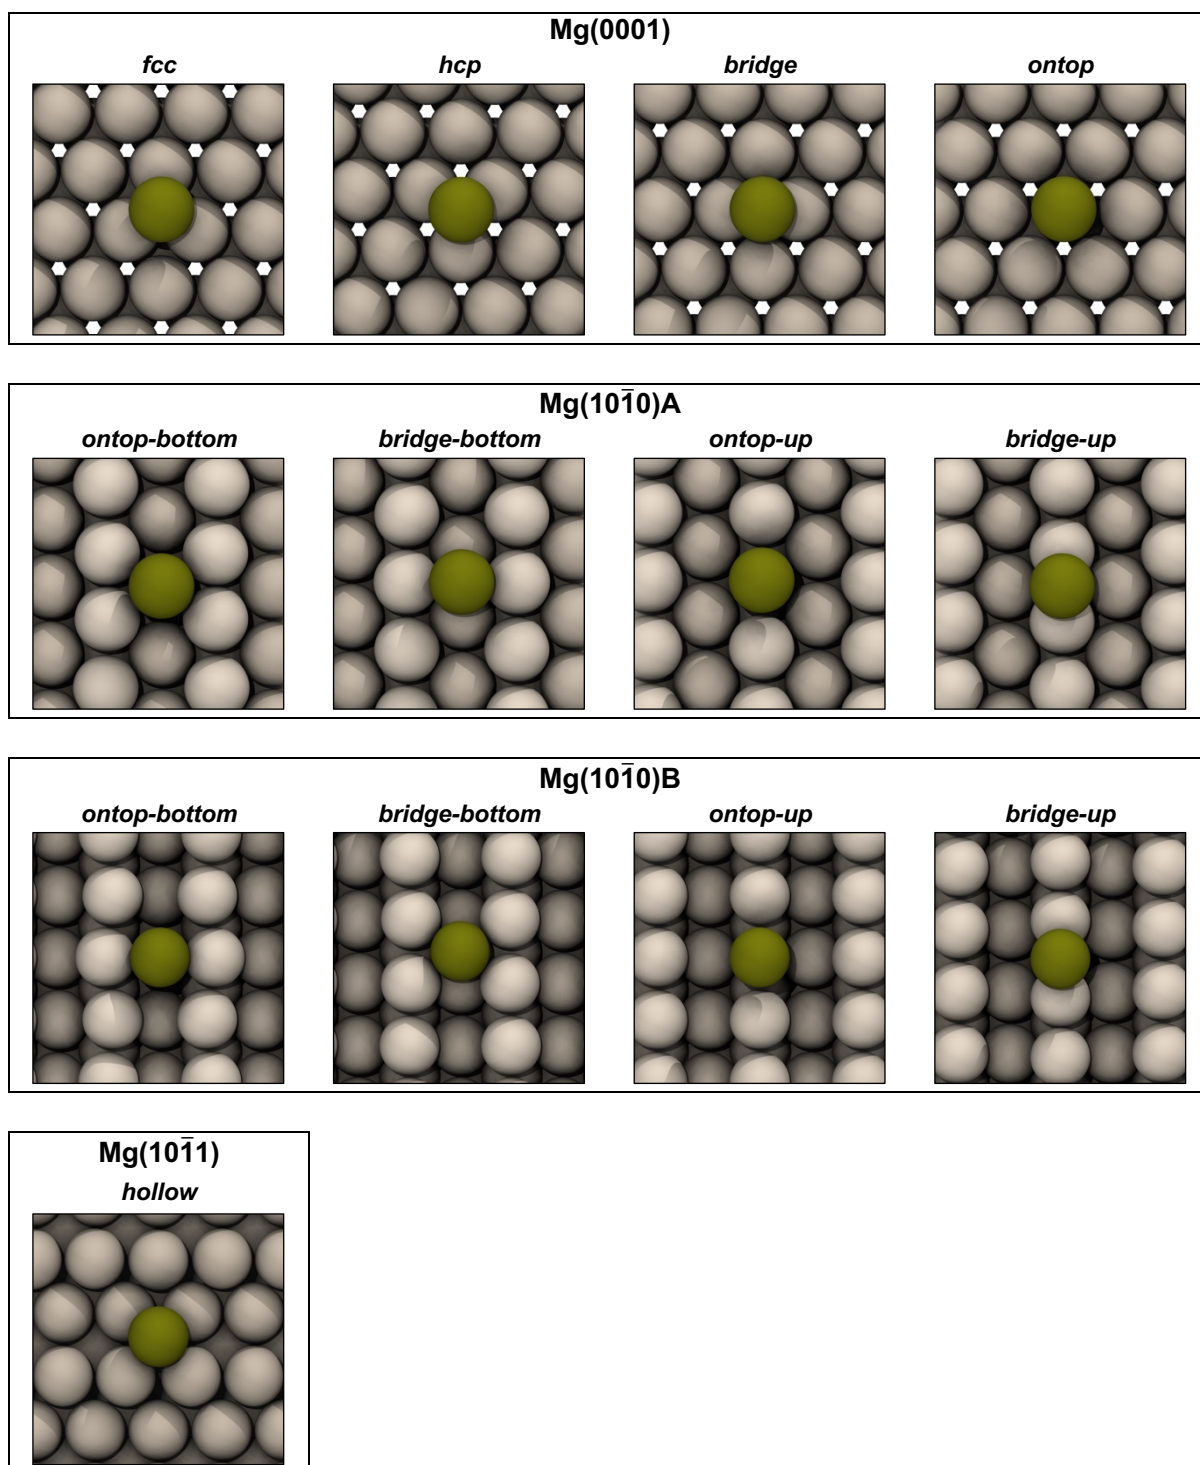

Figure S3. Schematic representation of the adsorption sites on Mg(0001), on the two surface terminations A and B of Mg(10 $\bar{1}$ 0) and on Mg(10 $\bar{1}$ 1).

## Diffusion properties

Table S7. Pre-exponential factors  $\nu$ , activation energies  $E_a$ , rate constants  $k_{@RT}$ , and activation temperatures  $T_a$  for forward and backward terrace self-diffusion processes from PBE calculations. The values are given in  $10^{12}$  Hertz, eV, Hz, and K, respectively.

| Terrace            | Pathway                             | $\nu^{for}$ | $E_a^{for}$ | $k_{@RT}^{for}$ | $T_a^{for}$ | $\nu^{rev}$ | $E_a^{rev}$ | $k_{@RT}^{rev}$ | $T_a^{rev}$ |
|--------------------|-------------------------------------|-------------|-------------|-----------------|-------------|-------------|-------------|-----------------|-------------|
| Mg(0001)           | $fcc_0 \leftrightarrow hcp_1$       | 0.6         | 0.02        | 2.7E+11         | 9           | 1.3         | 0.01        | 1.0E+12         | 2           |
|                    | $fcc_0 \leftrightarrow hcp_2$ (Ex.) | 3.0         | 0.74        | 6.0E-01         | 298         | 4.1         | 0.72        | 1.6E+00         | 289         |
| Mg(10 $\bar{1}$ 0) | $ob_0 \leftrightarrow ob_1$         | 1.2         | 0.02        | 4.6E+11         | 10          | 1.2         | 0.02        | 4.6E+11         | 10          |
|                    | $ob_0 \leftrightarrow ob_2$         | 1.2         | 0.42        | 6.8E+04         | 176         | 1.2         | 0.42        | 6.8E+04         | 176         |
|                    | $ob_0 \leftrightarrow ob_2$ (Ex.)   | 0.7         | 0.46        | 7.3E+03         | 198         | 0.7         | 0.46        | 7.3E+03         | 198         |
| Mg(10 $\bar{1}$ 1) | $h_0 \leftrightarrow h_1$           | 7.2         | 0.30        | 5.2E+07         | 117         | 7.2         | 0.30        | 5.2E+07         | 117         |
|                    | $h_0 \leftrightarrow h_1$ (Ex.)     | 4.7         | 0.59        | 3.0E+02         | 236         | 4.7         | 0.59        | 3.0E+02         | 236         |
|                    | $h_0 \leftrightarrow h_2$           | 4.5         | 0.42        | 2.5E+05         | 168         | 7.8         | 0.42        | 4.3E+05         | 165         |

Table S8. Pre-exponential factors  $\nu$ , activation energies  $E_a$ , rate constants  $k_{@RT}$ , and activation temperatures  $T_a$  for forward and backward terrace self-diffusion processes from BEEF-vdW calculations. The values are given in  $10^{12}$  Hertz, eV, Hz, and K, respectively.

| Terrace            | Pathway                             | $\nu^{for}$ | $E_a^{for}$ | $k_{@RT}^{for}$ | $T_a^{for}$ | $\nu^{rev}$ | $E_a^{rev}$ | $k_{@RT}^{rev}$ | $T_a^{rev}$ |
|--------------------|-------------------------------------|-------------|-------------|-----------------|-------------|-------------|-------------|-----------------|-------------|
| Mg(0001)           | $fcc_0 \leftrightarrow hcp_1$       | 3.5         | 0.02 (0.02) | 1.5E+12         | 8           | 3.4         | 0.01 (0.01) | 2.6E+12         | 4           |
|                    | $fcc_0 \leftrightarrow hcp_2$ (Ex.) | 5.8         | 0.79 (0.23) | 1.7E-01         | 312         | 9.6         | 0.77 (0.23) | 5.3E-01         | 299         |
| Mg(10 $\bar{1}$ 0) | $ob_0 \leftrightarrow ob_1$         | 8.1         | 0.02 (0.04) | 3.8E+12         | 8           | 8.1         | 0.02 (0.04) | 3.8E+12         | 8           |
|                    | $ob_0 \leftrightarrow ob_2$         | 6.2         | 0.35 (0.15) | 6.7E+06         | 138         | 6.2         | 0.35 (0.15) | 6.7E+06         | 138         |
|                    | $ob_0 \leftrightarrow ob_2$ (Ex.)   | 4.8         | 0.47 (0.14) | 3.7E+04         | 187         | 4.8         | 0.47 (0.14) | 3.7E+04         | 187         |
| Mg(10 $\bar{1}$ 1) | $h_0 \leftrightarrow h_1$           | 5.8         | 0.27 (0.06) | 1.2E+08         | 107         | 5.8         | 0.27 (0.06) | 1.2E+08         | 107         |
|                    | $h_0 \leftrightarrow h_1$ (Ex.)     | 1.7         | 0.62 (0.16) | 3.4E+01         | 255         | 1.7         | 0.62 (0.16) | 3.4E+01         | 255         |
|                    | $h_0 \leftrightarrow h_2$           | 5.4         | 0.38 (0.08) | 1.8E+06         | 150         | 4.7         | 0.38 (0.08) | 1.6E+06         | 151         |

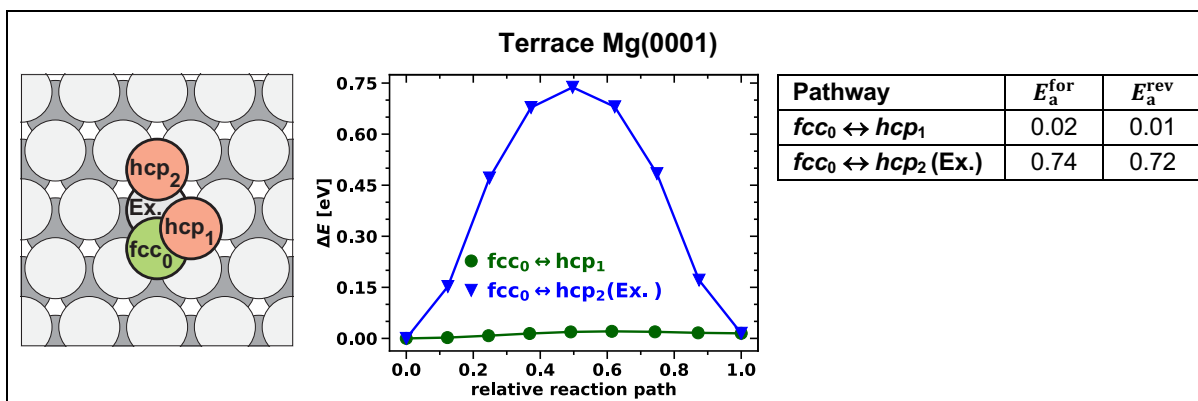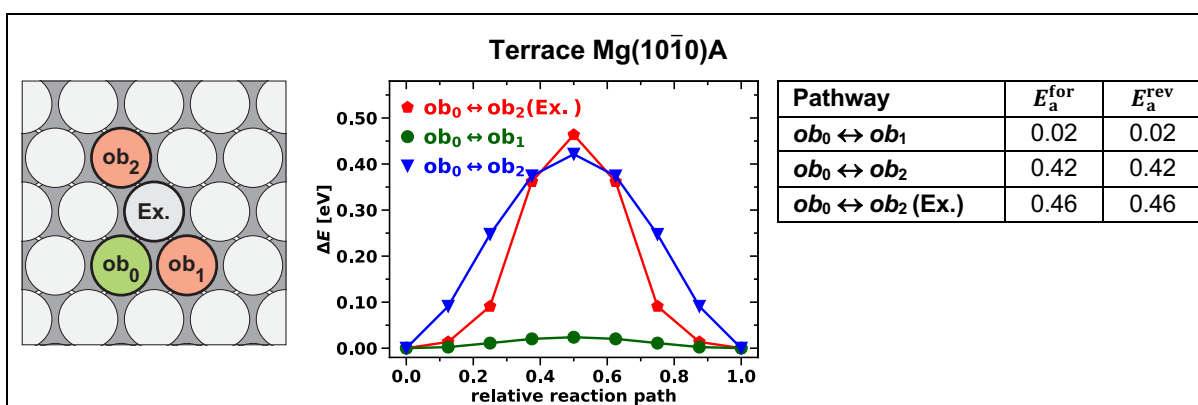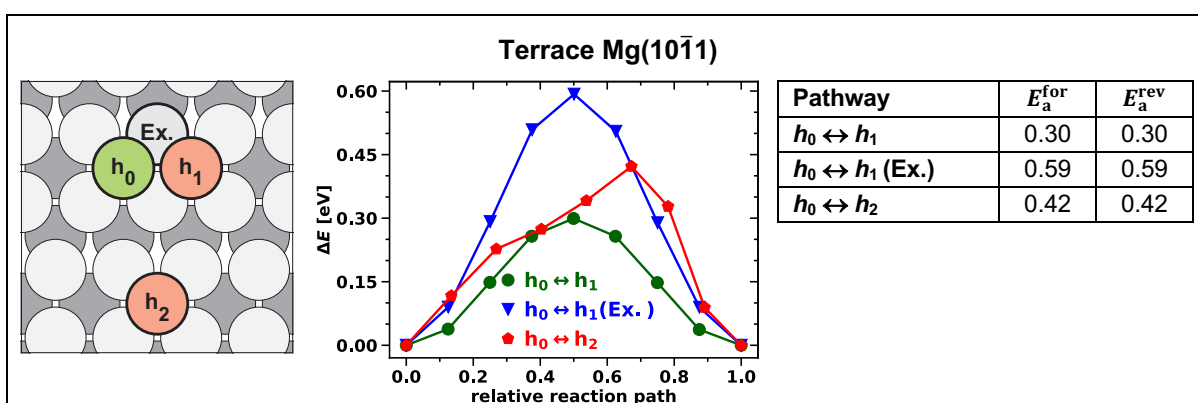

Figure S4. Schematic representation, energy profile and PBE activation energies  $E_a$  of terrace self-diffusion processes on Mg(0001), Mg(10 $\bar{1}$ 0), and Mg(10 $\bar{1}$ 1). Green-colored atoms mark the initial, while red-colored atoms mark the final positions. The values are given in eV.

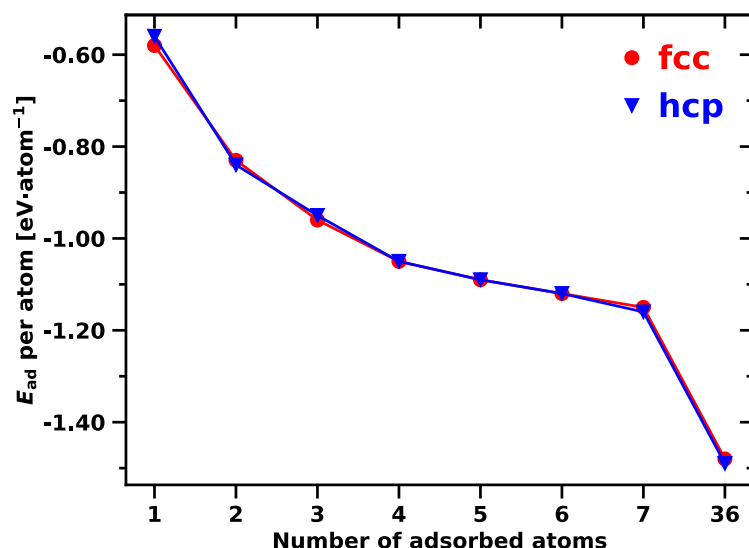

Figure S5. Adsorption energies per atom for islands of different sizes adsorbed in *fcc* and *hcp* positions on 6x6 Mg(0001). From a heptamer onwards, islands in *hcp* positions are more stable. Trimers, pentamers, and hexamers may form different conformations, with the most thermodynamically stable conformation used for the plot. 36 atoms correspond to a full monolayer.

Table S9. Adsorption energies per atoms for islands of different sizes adsorbed in *fcc* and *hcp* positions on 6x6 Mg(0001). The last column shows the stacking fault energy  $\Delta E_{ad} = E_{ad, fcc} - E_{ad, hcp}$ . Units are given in eV·atom<sup>-1</sup>.

| Island size         | <i>fcc</i><br>$E_{ad}$ per atom | <i>hcp</i><br>$E_{ad}$ per atom | Stacking-fault energy<br>$\Delta E_{ad}$ |
|---------------------|---------------------------------|---------------------------------|------------------------------------------|
| 1                   | -0.58                           | -0.56                           | -0.02                                    |
| 2                   | -0.83*                          | -0.84**                         | 0.01                                     |
| 3                   | -0.96, -0.93                    | -0.95, -0.93                    | -0.01                                    |
| 4                   | -1.05                           | -1.05                           | 0.00                                     |
| 5                   | -1.09, -1.07                    | -1.09, -1.07                    | 0.00                                     |
| 6                   | -1.12, -1.10, -1.08             | -1.12, -1.10, -1.09             | 0.00                                     |
| 7                   | -1.15                           | -1.16                           | 0.01                                     |
| 36 (Full monolayer) | -1.48                           | -1.49                           | 0.01                                     |

\* Both adsorbates are in *bridge-like* positions as shown in Error! Reference source not found.a.

\*\* Adsorbates are in a *fcc* and a *hcp* position, respectively as shown in Error! Reference source not found.b.

Table S10. Pre-exponential factors  $\nu$ , activation energies  $E_a$ , rate constants  $k_{@RT}$ , and activation temperatures  $T_a$  for forward and backward various self-diffusion processes from PBE calculations on Mg(0001). The values are given in  $10^{12}$  Hz, eV, Hz, and K respectively.

| System       | Path                                   | Pathway                                                    | $\nu^{for}$ | $E_a^{for}$ | $k_{@RT}^{for}$ | $T_a^{for}$ | $\nu^{rev}$ | $E_a^{rev}$ | $k_{@RT}^{rev}$ | $T_a^{rev}$ |
|--------------|----------------------------------------|------------------------------------------------------------|-------------|-------------|-----------------|-------------|-------------|-------------|-----------------|-------------|
| Dimer        | Merge                                  | $D_0 \leftrightarrow D_1$                                  | -           | 0.00        | -               | 0           | -           | 0.49        | -               | 194         |
|              |                                        | $D_2 \leftrightarrow D_3$                                  | -           | 0.00        | -               | 2           | -           | 0.46        | -               | 183         |
|              | Concerted                              | $CD_0 \leftrightarrow CD_1$                                | 0.7         | 0.07        | 1.3E+11         | 30          | 2.2         | 0.07        | 4.1E+10         | 29          |
|              |                                        | $CD_0 \leftrightarrow CD_2$                                | 0.4         | 0.01        | 5.4E+11         | 6           | 0.9         | 0.01        | 2.2E+11         | 5           |
| Trimer       | Merge                                  | $T_0 \leftrightarrow T_1$                                  | -           | 0.00        | -               | 1           | -           | 0.64        | -               | 254         |
|              | Concerted                              | $CT_0 \leftrightarrow CT_1$                                | 9.2         | 0.02        | 3.8E+10         | 7           | 3.8         | 0.12        | 4.5E+12         | 46          |
|              | Linear                                 | $TL_0 \leftrightarrow TL_2$                                | 2.3         | 0.01        | 1.1E+05         | 6           | 10.4        | 0.47        | 1.3E+12         | 180         |
|              |                                        | $TL_1 \leftrightarrow TL_2$                                | 1.5         | 0.02        | 3.3E+04         | 7           | 2.3         | 0.46        | 7.3E+11         | 186         |
|              |                                        | $TL_3 \leftrightarrow TL_5$                                | 1.5         | 0.00        | 5.3E+03         | 1           | 0.6         | 0.47        | 1.3E+12         | 201         |
|              |                                        | $TL_4 \leftrightarrow TL_5$                                | 1.2         | 0.01        | 6.9E+03         | 3           | 0.6         | 0.46        | 9.1E+11         | 198         |
|              |                                        | $TL_6 \leftrightarrow TL_8$                                | 0.7         | 0.01        | 1.8E+04         | 3           | 4.3         | 0.49        | 5.8E+11         | 194         |
|              |                                        | $TL_7 \leftrightarrow TL_8$                                | 0.9         | 0.02        | 1.7E+04         | 8           | 4.0         | 0.49        | 4.1E+11         | 195         |
|              | Interchange                            | $Tl_0 \leftrightarrow Tl_1$                                | 2.6         | 0.06        | 5.2E+10         | 24          | 39.8        | 0.17        | 2.5E+11         | 62          |
|              |                                        | $Tl_0 \leftrightarrow Tl_2$                                | 0.4         | 0.07        | 1.3E+09         | 30          | 3.8         | 0.20        | 2.3E+10         | 81          |
| Step-edge    | [11 $\bar{2}$ 0]-step                  | $S_0 \leftrightarrow S_1$                                  | 1.8         | 0.03        | 1.3E+09         | 12          | 19.0        | 0.70        | 1.1E+09         | 267         |
|              |                                        | $S_1 \leftrightarrow S_2$                                  | 6.4         | 0.22        | 1.3E+09         | 85          | 6.4         | 0.22        | 1.1E+09         | 85          |
|              | $[\bar{1}\bar{1}20]$ -step             | $S_3 \leftrightarrow S_4$                                  | 1.1         | 0.02        | 5.2E+09         | 7           | 5.5         | 0.63        | 5.2E+09         | 247         |
|              |                                        | $S_4 \leftrightarrow S_5$                                  | 1.9         | 0.15        | 5.2E+09         | 61          | 1.9         | 0.15        | 5.2E+09         | 61          |
| Step-vacancy | [11 $\bar{2}$ 0]-step                  | $SV_0 \leftrightarrow SV_1$                                | 0.6         | 0.03        | 2.8E-07         | 12          | 19.4        | 1.15        | 2.0E+11         | 438         |
|              | $[\bar{1}\bar{1}20]$ -step             | $SV_2 \leftrightarrow SV_3$                                | 0.4         | 0.02        | 3.9E-08         | 10          | 54.1        | 1.23        | 1.7E+11         | 451         |
| Kink         | [11 $\bar{2}$ 0]-step                  | $K_0 \leftrightarrow K_1$                                  | 9.4         | 0.45        | 1.8E+05         | 174         | 2.8         | 0.17        | 2.9E+09         | 70          |
|              |                                        | $K_0 \leftrightarrow K_2$                                  | 21.4        | 0.91        | 4.1E-03         | 346         | 1.5         | 0.02        | 7.4E+11         | 7           |
|              |                                        | $K_0 \leftrightarrow K_3$                                  | 4.9         | 0.51        | 8.7E+03         | 202         | 3.4         | 0.29        | 3.5E+07         | 117         |
|              | $[\bar{1}\bar{1}20]$ -step             | $K_4 \leftrightarrow K_5$                                  | 8.3         | 0.46        | 8.7E+04         | 181         | 3.0         | 0.12        | 2.8E+10         | 48          |
|              |                                        | $K_4 \leftrightarrow K_6$                                  | 17.9        | 0.92        | 2.6E-03         | 350         | 0.4         | 0.01        | 3.2E+11         | 3           |
|              |                                        | $K_4 \leftrightarrow K_7$                                  | 5.4         | 0.56        | 1.1E+03         | 223         | 2.2         | 0.22        | 3.1E+08         | 92          |
| Inner-corner | 60° corner: [11 $\bar{2}$ 0]-step      | $IC_0 \leftrightarrow IC_1$                                | 11.2        | 0.63        | 1.5E+02         | 244         | 4.7         | 0.10        | 9.7E+10         | 39          |
|              | 60° corner: $[\bar{1}\bar{1}20]$ -step | $IC_2 \leftrightarrow IC_3$                                | 13.9        | 0.62        | 3.4E+02         | 237         | 4.1         | 0.08        | 2.0E+11         | 30          |
|              | 120° corner                            | $IC_4 \leftrightarrow IC_5$                                | 6.8         | 0.43        | 3.1E+05         | 168         | 5.2         | 0.18        | 3.8E+09         | 72          |
|              |                                        | $IC_4 \leftrightarrow IC_6$                                | 5.6         | 0.43        | 2.1E+05         | 171         | 2.4         | 0.10        | 4.1E+10         | 42          |
| Outer-corner | 240° corner                            | $OC_0 \leftrightarrow OC_1$                                | 0.7         | 0.29        | 1.2E+08         | 125         | 2.6         | 0.22        | 1.5E+12         | 88          |
|              |                                        | $OC_0 \leftrightarrow OC_1$ (Ex.)                          | 8.6         | 0.41        | 9.3E+05         | 158         | 9.1         | 0.33        | 2.1E+07         | 128         |
|              | 300° corner: [11 $\bar{2}$ 0]-step     | $OC_2 \leftrightarrow OC_3$<br>$OC_5 \leftrightarrow OC_4$ | 1.0         | 0.24        | 9.5E+07         | 99          | 4.0         | 0.00        | 3.5E+12         | 1           |
|              |                                        | $OC_3 \leftrightarrow OC_4$                                | 1.3         | 0.03        | 3.4E+11         | 14          | 1.6         | 0.03        | 4.2E+11         | 14          |
|              |                                        | $OC_2 \leftrightarrow OC_5$ (Ex.)                          | 8.0         | 0.32        | 3.1E+07         | 123         | 7.8         | 0.32        | 3.0E+07         | 123         |

|                      |                             |                                                            |      |      |         |     |      |      |         |     |
|----------------------|-----------------------------|------------------------------------------------------------|------|------|---------|-----|------|------|---------|-----|
|                      | 300° corner:<br>[1120]-step | $OC_6 \leftrightarrow OC_7$<br>$OC_8 \leftrightarrow OC_7$ | 0.2  | 0.20 | 7.2E+07 | 89  | 2.0  | 0.03 | 7.4E+11 | 10  |
|                      |                             | $OC_6 \leftrightarrow OC_8$<br>(Ex.)                       | 1.5  | 0.16 | 2.7E+09 | 66  | 2.2  | 0.16 | 4.0E+09 | 65  |
| Step-down            | [1120]-step                 | $E_0 \leftrightarrow E_1$                                  | 2.0  | 0.09 | 1.5E+00 | 38  | 13.6 | 0.75 | 5.2E+10 | 289 |
|                      |                             | $E_0 \leftrightarrow E_1$ (Ex.)                            | 2.4  | 0.01 | 7.0E+01 | 2   | 21.5 | 0.67 | 1.9E+12 | 253 |
|                      | [1120]-step                 | $E_2 \leftrightarrow E_3$                                  | 0.8  | 0.16 | 7.5E+00 | 67  | 8.5  | 0.70 | 1.6E+09 | 273 |
|                      |                             | $E_2 \leftrightarrow E_3$ (Ex.)                            | -    | 0.02 | -       | 6   | -    | 0.56 | -       | 222 |
| Step-down<br>(dimer) | [1120]-step                 | $ED_0 \leftrightarrow ED_1$                                | 6.9  | 0.58 | 2.1E+00 | 226 | 10.1 | 0.74 | 8.9E+02 | 286 |
|                      |                             | $ED_0 \leftrightarrow ED_1$<br>(Ex.)                       | 4.4  | 0.21 | 2.7E+06 | 85  | 7.6  | 0.38 | 9.9E+08 | 147 |
|                      | [1120]-step                 | $ED_2 \leftrightarrow ED_3$                                | 15.1 | 0.67 | 4.7E+00 | 256 | 2.6  | 0.68 | 4.6E+01 | 277 |
|                      |                             | $ED_2 \leftrightarrow ED_3$<br>(Ex.)                       | 3.0  | 0.11 | 8.2E+09 | 44  | 3.2  | 0.15 | 4.1E+10 | 61  |
| Upper-step           | [1120]-step                 | $US_0 \leftrightarrow US_1$                                | 1.7  | 0.02 | 3.1E+11 | 6   | 1.7  | 0.01 | 1.2E+12 | 2   |
|                      |                             | $US_1 \leftrightarrow US_2$                                | 1.7  | 0.01 | 1.2E+12 | 4   | 0.8  | 0.03 | 3.1E+11 | 11  |
|                      |                             | $US_2 \leftrightarrow US_3$                                | 0.9  | 0.02 | 4.9E+11 | 6   | 1.3  | 0.02 | 7.2E+11 | 6   |
|                      | [1120]-step                 | $US_4 \leftrightarrow US_5$                                | 0.8  | 0.00 | 2.9E+11 | 1   | 2.9  | 0.03 | 2.1E+12 | 12  |
|                      |                             | $US_5 \leftrightarrow US_6$                                | 2.2  | 0.00 | 2.1E+12 | 0   | 0.6  | 0.02 | 2.9E+11 | 7   |

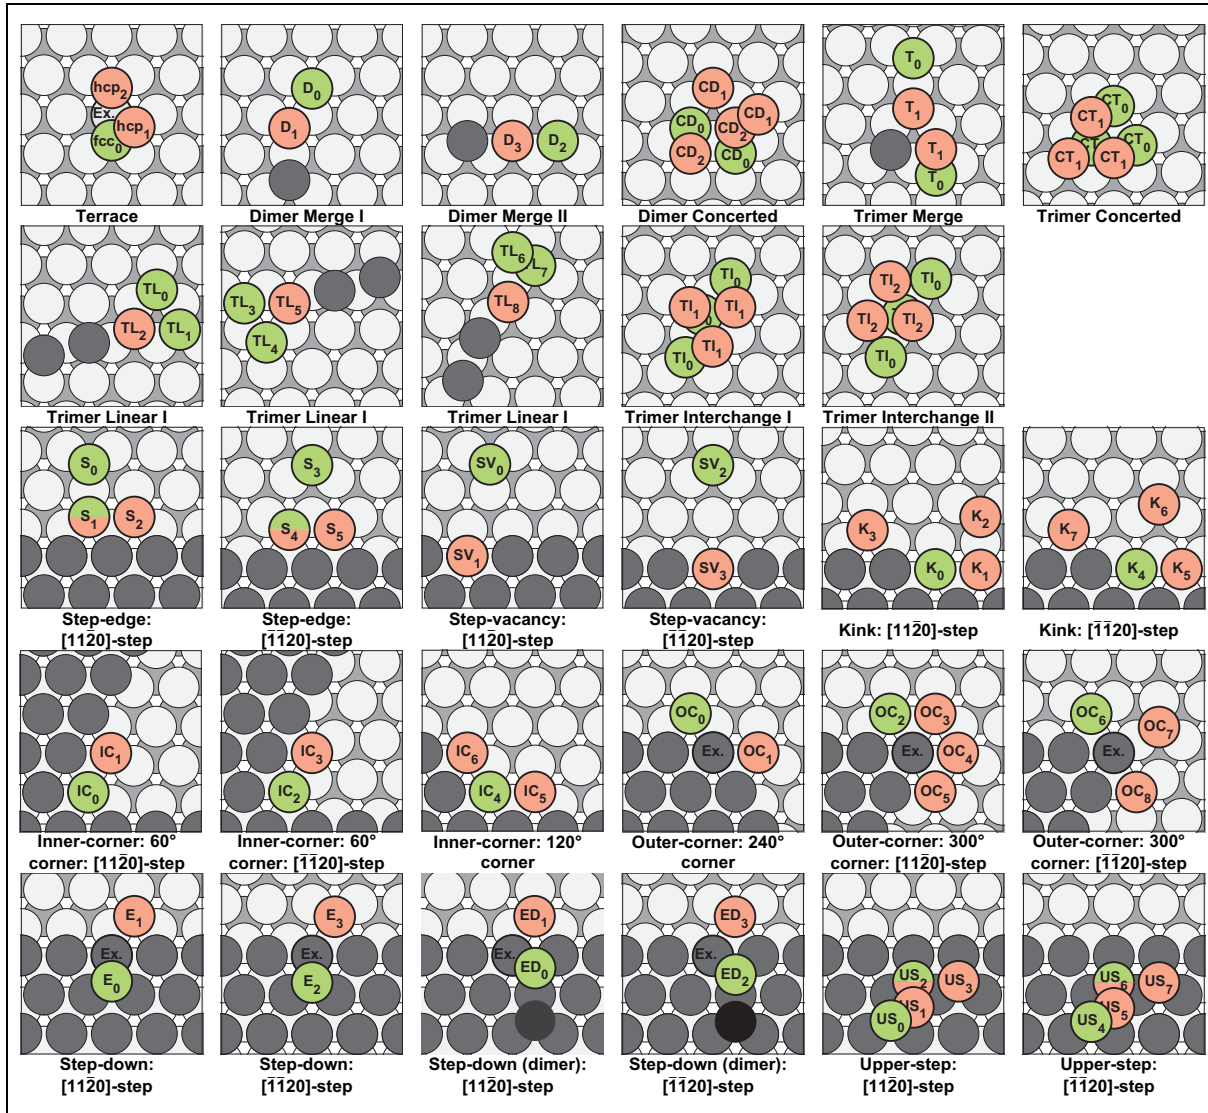

Figure S6. Schematic representation of all investigated diffusion pathways on Mg(0001).

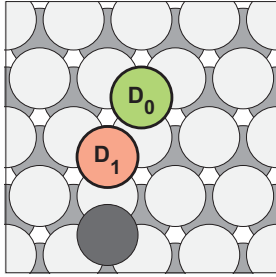

Dimer: Merge 1

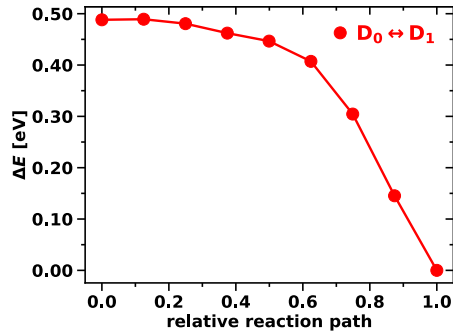

| Pathway                   | $E_a^{\text{for}}$ | $E_a^{\text{rev}}$ |
|---------------------------|--------------------|--------------------|
| $D_0 \leftrightarrow D_1$ | 0.00               | 0.49               |

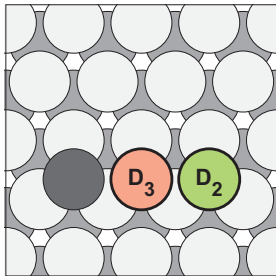

Dimer: Merge 2

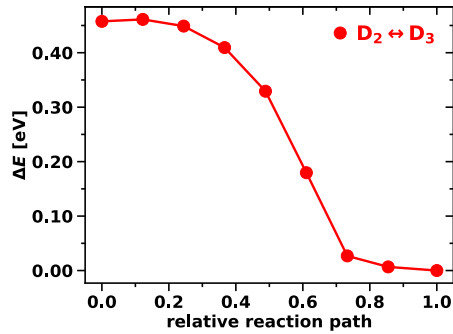

| Pathway                   | $E_a^{\text{for}}$ | $E_a^{\text{rev}}$ |
|---------------------------|--------------------|--------------------|
| $D_2 \leftrightarrow D_3$ | 0.00               | 0.46               |

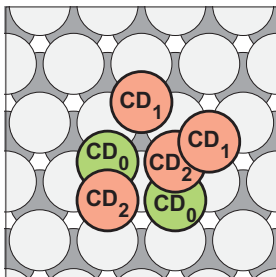

Dimer: Concerted

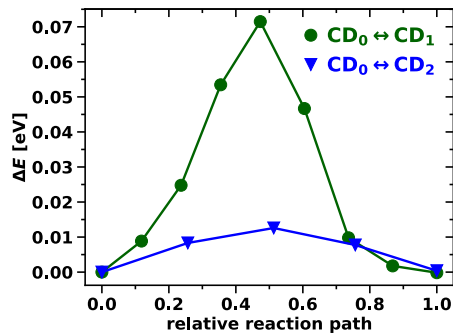

| Pathway                     | $E_a^{\text{for}}$ | $E_a^{\text{rev}}$ |
|-----------------------------|--------------------|--------------------|
| $CD_0 \leftrightarrow CD_1$ | 0.07               | 0.07               |
| $CD_0 \leftrightarrow CD_2$ | 0.01               | 0.01               |

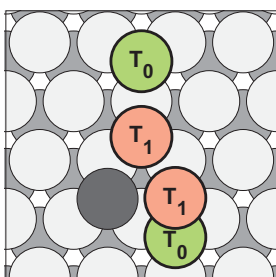

Trimer: Merge

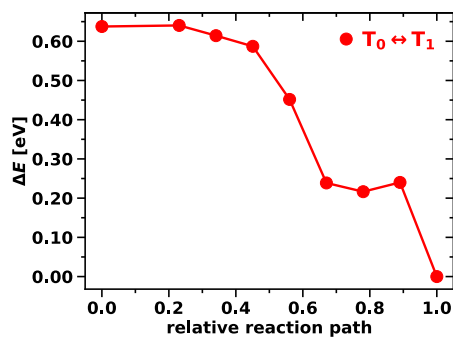

| Pathway                   | $E_a^{\text{for}}$ | $E_a^{\text{rev}}$ |
|---------------------------|--------------------|--------------------|
| $T_0 \leftrightarrow T_1$ | 0.00               | 0.64               |



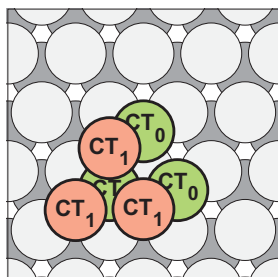

Trimer: Concerted

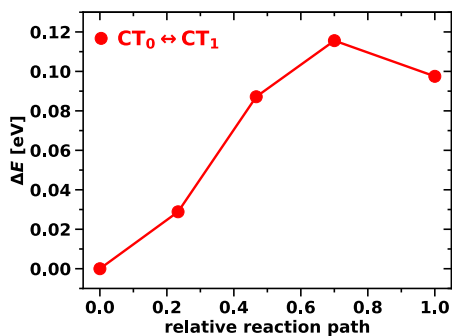

| Pathway                     | $E_a^{\text{for}}$ | $E_a^{\text{rev}}$ |
|-----------------------------|--------------------|--------------------|
| $CT_0 \leftrightarrow CT_1$ | 0.02               | 0.12               |

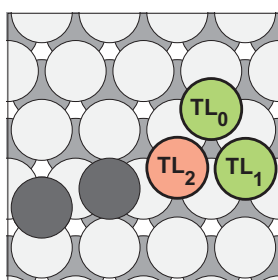

Trimer: Linear 1

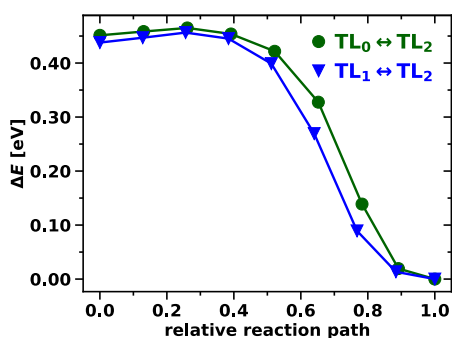

| Pathway                     | $E_a^{\text{for}}$ | $E_a^{\text{rev}}$ |
|-----------------------------|--------------------|--------------------|
| $TL_0 \leftrightarrow TL_2$ | 0.01               | 0.47               |
| $TL_1 \leftrightarrow TL_2$ | 0.02               | 0.46               |

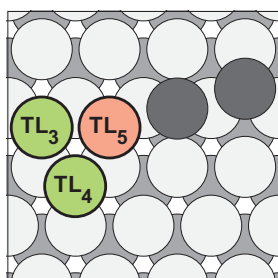

Trimer: Linear 2

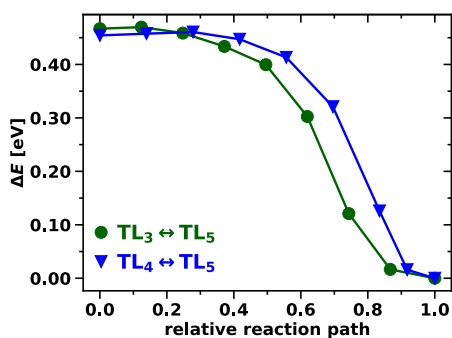

| Pathway                     | $E_a^{\text{for}}$ | $E_a^{\text{rev}}$ |
|-----------------------------|--------------------|--------------------|
| $TL_3 \leftrightarrow TL_5$ | 0.00               | 0.47               |
| $TL_4 \leftrightarrow TL_5$ | 0.01               | 0.46               |

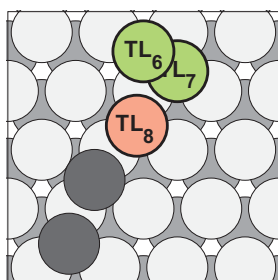

Trimer: Linear 3

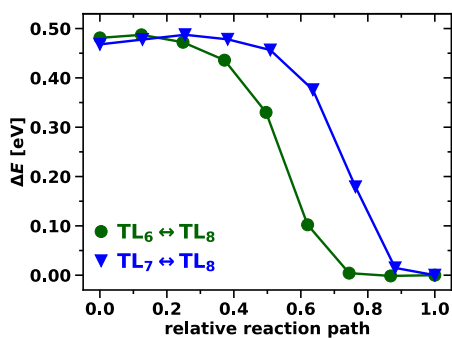

| Pathway                     | $E_a^{\text{for}}$ | $E_a^{\text{rev}}$ |
|-----------------------------|--------------------|--------------------|
| $TL_6 \leftrightarrow TL_8$ | 0.01               | 0.49               |
| $TL_7 \leftrightarrow TL_8$ | 0.02               | 0.49               |

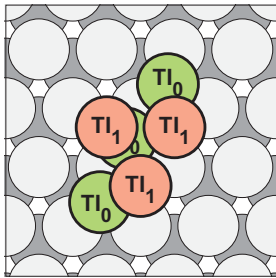

Trimer: Interchange 1

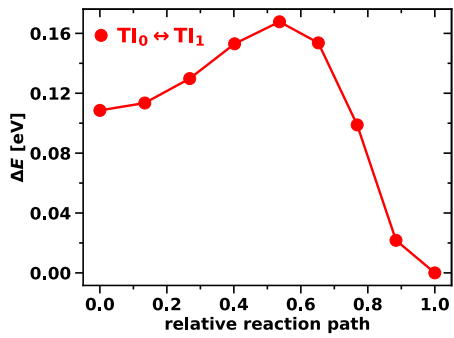

| Pathway                     | $E_a^{\text{for}}$ | $E_a^{\text{rev}}$ |
|-----------------------------|--------------------|--------------------|
| $Tl_0 \leftrightarrow Tl_1$ | 0.06               | 0.17               |

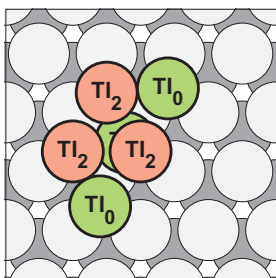

Trimer: Interchange 2

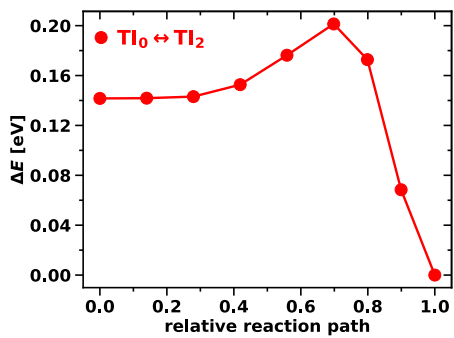

| Pathway                     | $E_a^{\text{for}}$ | $E_a^{\text{rev}}$ |
|-----------------------------|--------------------|--------------------|
| $Tl_0 \leftrightarrow Tl_2$ | 0.07               | 0.20               |

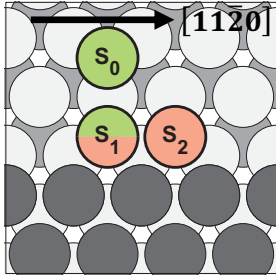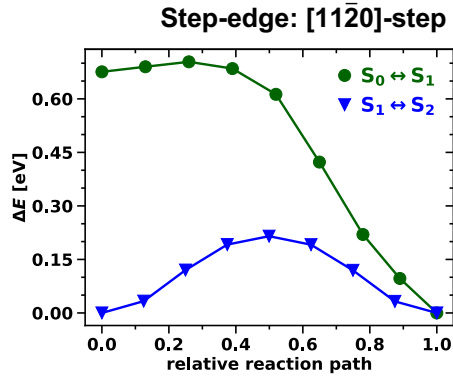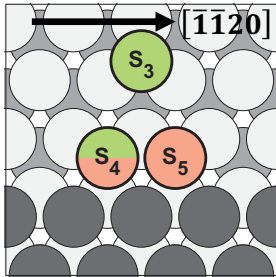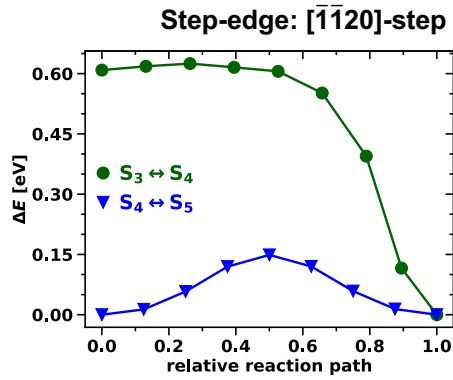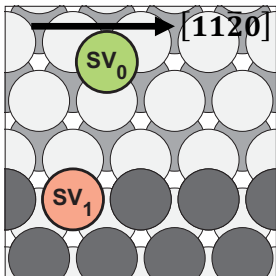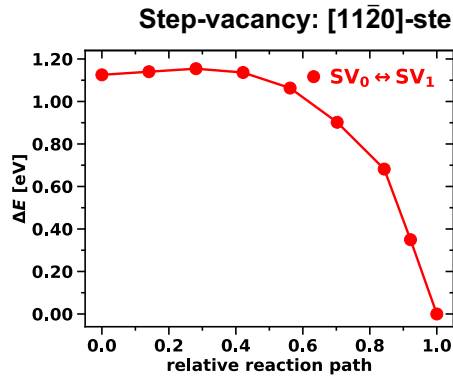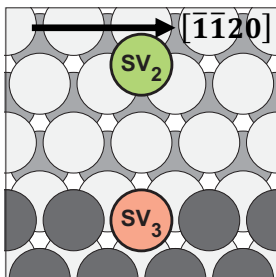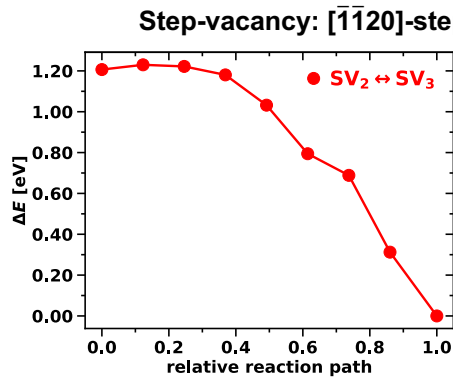

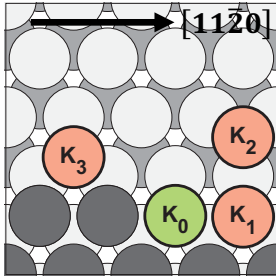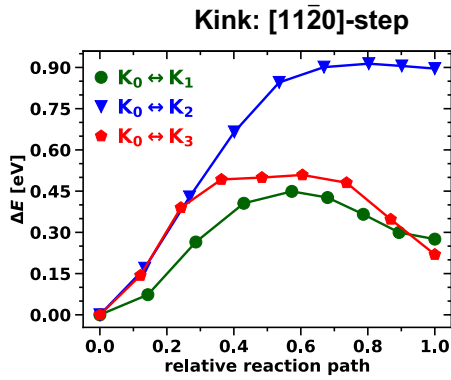

| Pathway                   | $E_a^{\text{for}}$ | $E_a^{\text{rev}}$ |
|---------------------------|--------------------|--------------------|
| $K_0 \leftrightarrow K_1$ | 0.45               | 0.17               |
| $K_0 \leftrightarrow K_2$ | 0.91               | 0.02               |
| $K_0 \leftrightarrow K_3$ | 0.51               | 0.29               |

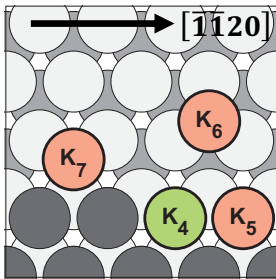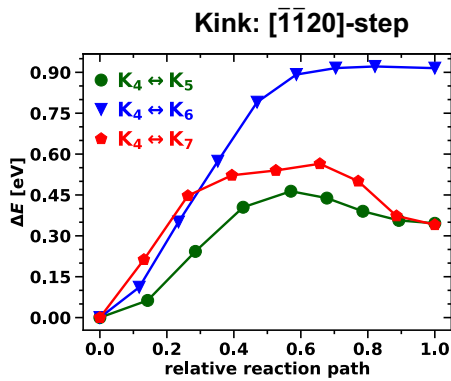

| Pathway                   | $E_a^{\text{for}}$ | $E_a^{\text{rev}}$ |
|---------------------------|--------------------|--------------------|
| $K_4 \leftrightarrow K_5$ | 0.46               | 0.12               |
| $K_4 \leftrightarrow K_6$ | 0.92               | 0.01               |
| $K_4 \leftrightarrow K_7$ | 0.56               | 0.22               |

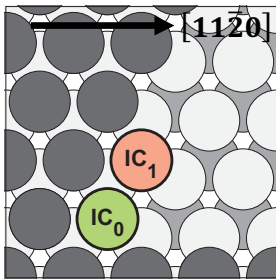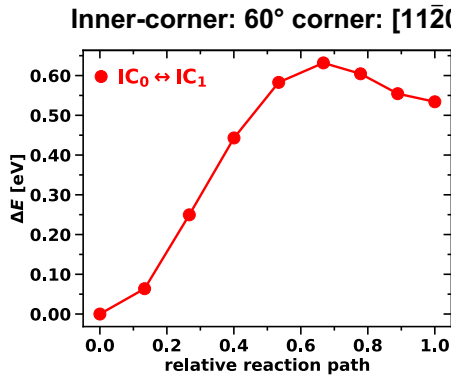

| Pathway                     | $E_a^{\text{for}}$ | $E_a^{\text{rev}}$ |
|-----------------------------|--------------------|--------------------|
| $IC_0 \leftrightarrow IC_1$ | 0.63               | 0.10               |

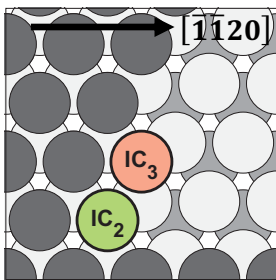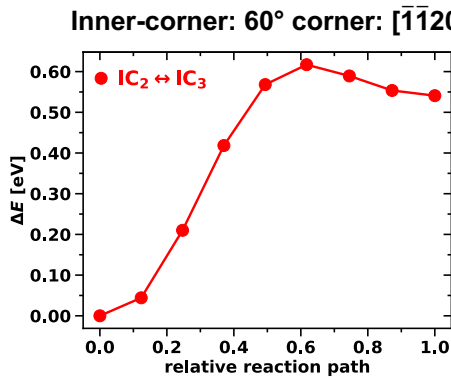

| Pathway                     | $E_a^{\text{for}}$ | $E_a^{\text{rev}}$ |
|-----------------------------|--------------------|--------------------|
| $IC_2 \leftrightarrow IC_3$ | 0.62               | 0.08               |

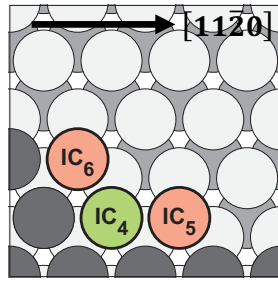

Inner-corner: 120° corner

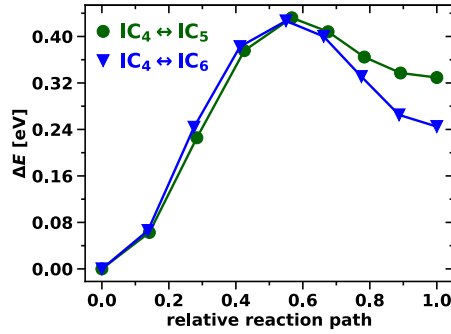

| Pathway                     | $E_a^{\text{for}}$ | $E_a^{\text{rev}}$ |
|-----------------------------|--------------------|--------------------|
| $IC_4 \leftrightarrow IC_5$ | 0.43               | 0.18               |
| $IC_4 \leftrightarrow IC_6$ | 0.43               | 0.10               |

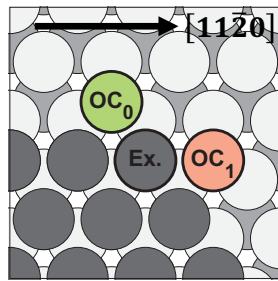

Outer-corner: 240° corner

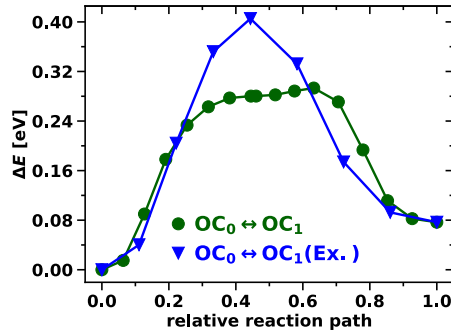

| Pathway                                 | $E_a^{\text{for}}$ | $E_a^{\text{rev}}$ |
|-----------------------------------------|--------------------|--------------------|
| $OC_0 \leftrightarrow OC_1$             | 0.29               | 0.22               |
| $OC_0 \leftrightarrow OC_1(\text{Ex.})$ | 0.41               | 0.33               |

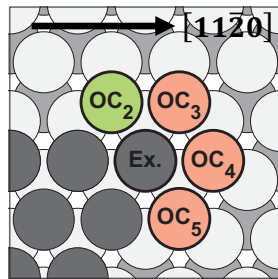

Outer-corner: 300° corner:  $[11\bar{2}0]$ -step

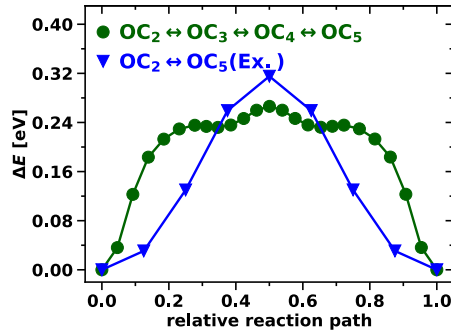

| Pathway                                                      | $E_a^{\text{for}}$ | $E_a^{\text{rev}}$ |
|--------------------------------------------------------------|--------------------|--------------------|
| $OC_2 \leftrightarrow OC_3 /$<br>$OC_5 \leftrightarrow OC_4$ | 0.24               | 0.00               |
| $OC_3 \leftrightarrow OC_4$                                  | 0.03               | 0.03               |
| $OC_2 \leftrightarrow OC_5(\text{Ex.})$                      | 0.32               | 0.32               |

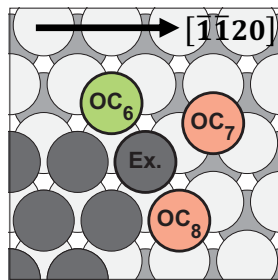

Outer-corner: 300° corner:  $[\bar{1}120]$ -step

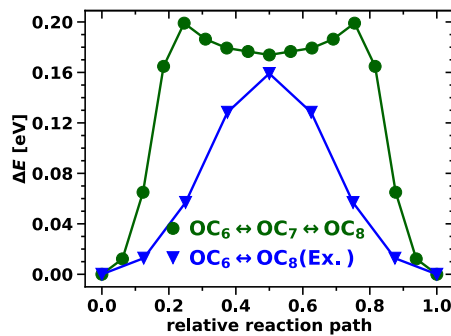

| Pathway                                                      | $E_a^{\text{for}}$ | $E_a^{\text{rev}}$ |
|--------------------------------------------------------------|--------------------|--------------------|
| $OC_6 \leftrightarrow OC_7 /$<br>$OC_8 \leftrightarrow OC_7$ | 0.20               | 0.03               |
| $OC_6 \leftrightarrow OC_8(\text{Ex.})$                      | 0.16               | 0.16               |

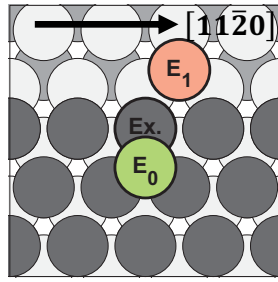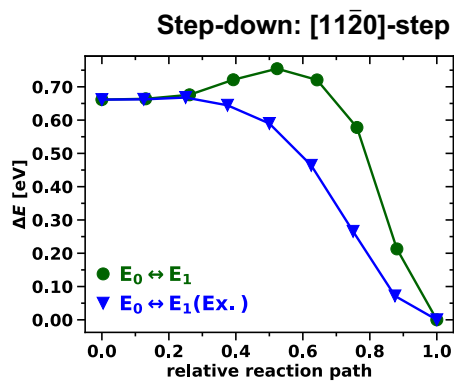

| Pathway                         | $E_a^{for}$ | $E_a^{rev}$ |
|---------------------------------|-------------|-------------|
| $E_0 \leftrightarrow E_1$       | 0.09        | 0.75        |
| $E_0 \leftrightarrow E_1$ (Ex.) | 0.01        | 0.67        |

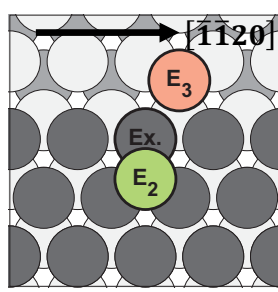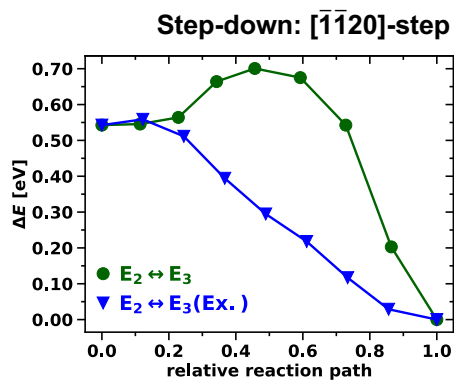

| Pathway                         | $E_a^{for}$ | $E_a^{rev}$ |
|---------------------------------|-------------|-------------|
| $E_2 \leftrightarrow E_3$       | 0.16        | 0.70        |
| $E_2 \leftrightarrow E_3$ (Ex.) | 0.02        | 0.56        |

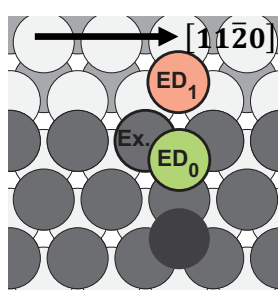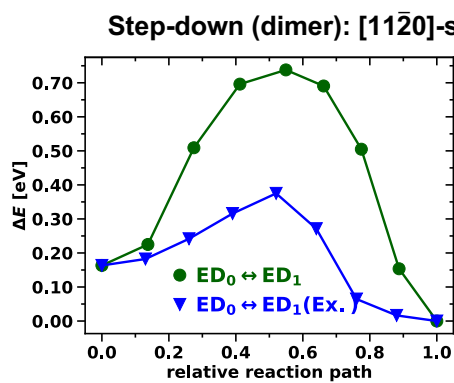

| Pathway                           | $E_a^{for}$ | $E_a^{rev}$ |
|-----------------------------------|-------------|-------------|
| $ED_0 \leftrightarrow ED_1$       | 0.58        | 0.74        |
| $ED_0 \leftrightarrow ED_1$ (Ex.) | 0.21        | 0.38        |

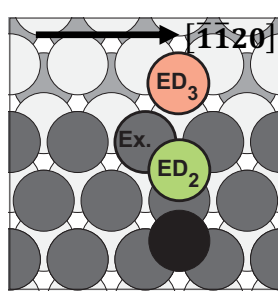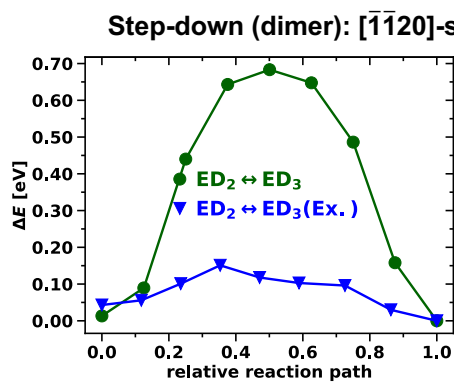

| Pathway                           | $E_a^{for}$ | $E_a^{rev}$ |
|-----------------------------------|-------------|-------------|
| $ED_2 \leftrightarrow ED_3$       | 0.67        | 0.68        |
| $ED_2 \leftrightarrow ED_3$ (Ex.) | 0.11        | 0.15        |

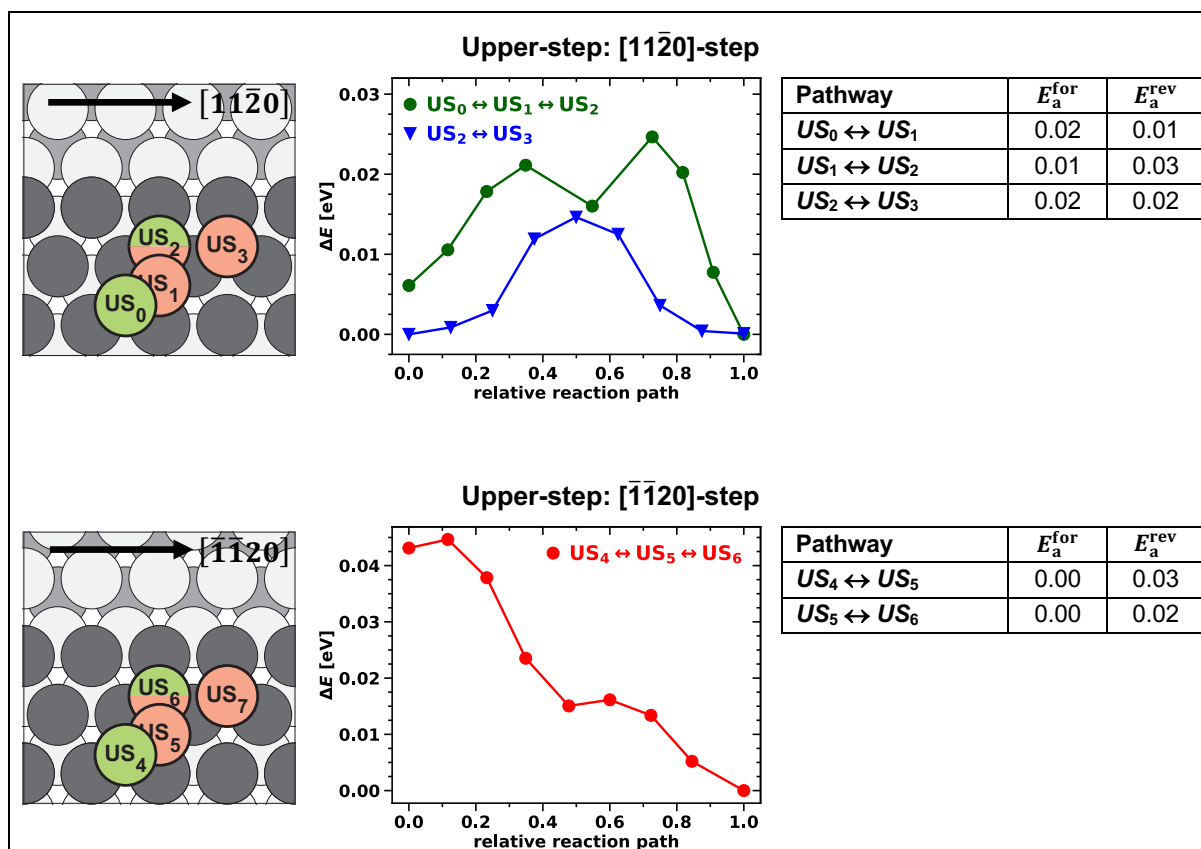

Figure S7. Schematic representation, energy profile and PBE activation energies  $E_a$  of self-diffusion processes studied on Mg(0001). Green-colored atoms mark the initial, while red-colored atoms mark the final positions. The values are given in eV.

Table S11. Pre-exponential factors  $\nu$ , activation energies  $E_a$ , rate constants  $k_{@RT}$ , and activation temperatures  $T_a$  for forward and backward various self-diffusion processes from PBE calculations on Mg(10 $\bar{1}$ 1). The values are given in 10<sup>12</sup> Hertz, eV, Hz, and K, respectively.

| System                                | Path                               | Pathway                            | $\nu^{for}$ | $E_a^{for}$ | $k_{@RT}^{for}$ | $T_a^{for}$ | $\nu^{rev}$ | $E_a^{rev}$ | $k_{@RT}^{rev}$ | $T_a^{rev}$ |
|---------------------------------------|------------------------------------|------------------------------------|-------------|-------------|-----------------|-------------|-------------|-------------|-----------------|-------------|
| Dimer                                 | Merge                              | $d_0 \leftrightarrow d_1$          | 11.6        | 0.25        | 5.0E+08         | 98          | 23.6        | 0.58        | 2.6E+03         | 218         |
|                                       |                                    | $d_2 \leftrightarrow d_3$          | 4.8         | 0.19        | 2.8E+09         | 75          | 2.6         | 0.13        | 1.5E+10         | 53          |
|                                       |                                    | $d_3 \leftrightarrow d_1$          | 2.4         | 0.15        | 6.0E+09         | 61          | 10.6        | 0.51        | 2.0E+04         | 197         |
|                                       |                                    | $d_4 \leftrightarrow d_1$          | 10.2        | 0.37        | 5.2E+06         | 142         | 11.9        | 0.67        | 3.2E+01         | 259         |
|                                       | Concerted                          | $cd_0 \leftrightarrow cd_1$        | 19.0        | 0.54        | 1.0E+04         | 205         | 18.9        | 0.54        | 1.0E+04         | 205         |
| Trimer                                | Merge                              | $t_0 \leftrightarrow t_1$          | 5.6         | 0.26        | 2.3E+08         | 103         | 13.1        | 0.58        | 1.2E+03         | 223         |
|                                       |                                    | $t_2 \leftrightarrow t_3$          | 7.8         | 0.19        | 4.6E+09         | 73          | 4.1         | 0.20        | 1.3E+09         | 82          |
|                                       |                                    | $t_3 \leftrightarrow t_1$          | 3.3         | 0.27        | 7.6E+07         | 109         | 11.0        | 0.54        | 5.7E+03         | 209         |
|                                       |                                    | $t_4 \leftrightarrow t_5$          | 8.1         | 0.31        | 3.5E+07         | 122         | 6.3         | 0.57        | 9.3E+02         | 225         |
|                                       |                                    | $t_5 \leftrightarrow t_1$          | 1.6         | 0.24        | 1.4E+08         | 98          | 4.9         | 0.28        | 8.4E+07         | 110         |
| Step-edge                             | [ $\bar{1}\bar{2}\bar{1}0$ ]A-step | $s_0 \leftrightarrow s_1$          | 9.6         | 0.35        | 1.1E+07         | 134         | 9.9         | 0.59        | 6.8E+02         | 229         |
|                                       |                                    | $s_1 \leftrightarrow s_2$          | 2.7         | 0.13        | 1.8E+10         | 51          | 4.1         | 0.13        | 2.8E+10         | 50          |
|                                       | [ $\bar{1}\bar{2}\bar{1}0$ ]B-step | $s_3 \leftrightarrow s_4$          | 9.3         | 0.44        | 2.6E+05         | 171         | 6.8         | 0.73        | 2.3E+00         | 285         |
|                                       |                                    | $s_4 \leftrightarrow s_5$          | 3.7         | 0.16        | 8.0E+09         | 62          | 3.4         | 0.16        | 7.3E+09         | 62          |
|                                       | [ $\bar{1}\bar{2}\bar{1}0$ ]A-step | $s_6 \leftrightarrow s_7$          | 6.8         | 0.14        | 2.5E+10         | 56          | 0.1         | 0.18        | 1.1E+08         | 81          |
|                                       |                                    | $s_7 \leftrightarrow s_8$          | 1.0         | 0.01        | 6.3E+11         | 5           | 0.6         | 0.01        | 4.1E+11         | 5           |
|                                       | [ $\bar{1}\bar{2}\bar{1}0$ ]B-step | $s_9 \leftrightarrow s_{10}$       | 4.5         | 0.36        | 2.7E+06         | 144         | 15.6        | 0.95        | 7.5E-04         | 363         |
|                                       |                                    | $s_{10} \leftrightarrow s_{11}$    | 10.2        | 0.40        | 1.2E+06         | 156         | 11.3        | 0.40        | 1.3E+06         | 156         |
| [ $10\bar{1}2$ ]-step                 | $s_{12} \leftrightarrow s_{13}$    | 18.5                               | 0.18        | 1.5E+10     | 68              | 46.2        | 0.71        | 3.4E+01     | 260             |             |
|                                       | $s_{13} \leftrightarrow s_{14}$    | 6.8                                | 0.45        | 1.3E+05     | 177             | 7.4         | 0.45        | 1.3E+05     | 176             |             |
| Step-down                             | [ $\bar{1}\bar{2}\bar{1}0$ ]A-step | $e_0 \leftrightarrow e_1$          | 10.2        | 0.44        | 3.1E+05         | 169         | 10.3        | 0.67        | 3.8E+01         | 258         |
|                                       |                                    | $e_0 \leftrightarrow e_2$ (Ex.)    | 4.1         | 0.11        | 5.5E+10         | 44          | 3.9         | 0.34        | 6.0E+06         | 135         |
|                                       | [ $\bar{1}\bar{2}\bar{1}0$ ]B-step | $e_3 \leftrightarrow e_4$          | 8.3         | 0.43        | 3.3E+05         | 168         | 13.7        | 0.75        | 1.7E+00         | 288         |
|                                       |                                    | $e_3 \leftrightarrow e_4$ (Ex.)    | 5.4         | 0.26        | 1.8E+08         | 103         | 7.2         | 0.58        | 7.1E+02         | 228         |
|                                       | [ $\bar{1}\bar{2}\bar{1}0$ ]A-step | $e_5 \leftrightarrow e_6$          | 6.0         | 0.29        | 7.3E+07         | 113         | 2.4         | 0.04        | 4.9E+11         | 16          |
|                                       |                                    | $e_6 \leftrightarrow e_7$          | 3.5         | 0.12        | 3.3E+10         | 47          | 1.3         | 0.42        | 7.8E+04         | 175         |
|                                       |                                    | $e_5 \leftrightarrow e_7$ (Ex.)    | 9.9         | 0.47        | 8.6E+04         | 182         | 1.6         | 0.53        | 1.5E+03         | 217         |
|                                       | [ $\bar{1}\bar{2}\bar{1}0$ ]B-step | $e_8 \leftrightarrow e_9$          | 6.9         | 0.44        | 1.7E+05         | 174         | 11.0        | 0.96        | 3.6E-04         | 371         |
|                                       |                                    | $e_8 \leftrightarrow e_{10}$ (Ex.) | 3.3         | 0.07        | 1.9E+11         | 29          | 8.4         | 0.59        | 6.5E+02         | 229         |
|                                       | [ $10\bar{1}2$ ]-step              | $e_{11} \leftrightarrow e_{12}$    | 18.7        | 0.38        | 5.5E+06         | 144         | 21.6        | 0.89        | 1.2E-02         | 336         |
| $e_{11} \leftrightarrow e_{12}$ (Ex.) |                                    | 6.8                                | 0.20        | 2.8E+09     | 77              | 12.5        | 0.71        | 9.4E+00     | 271             |             |



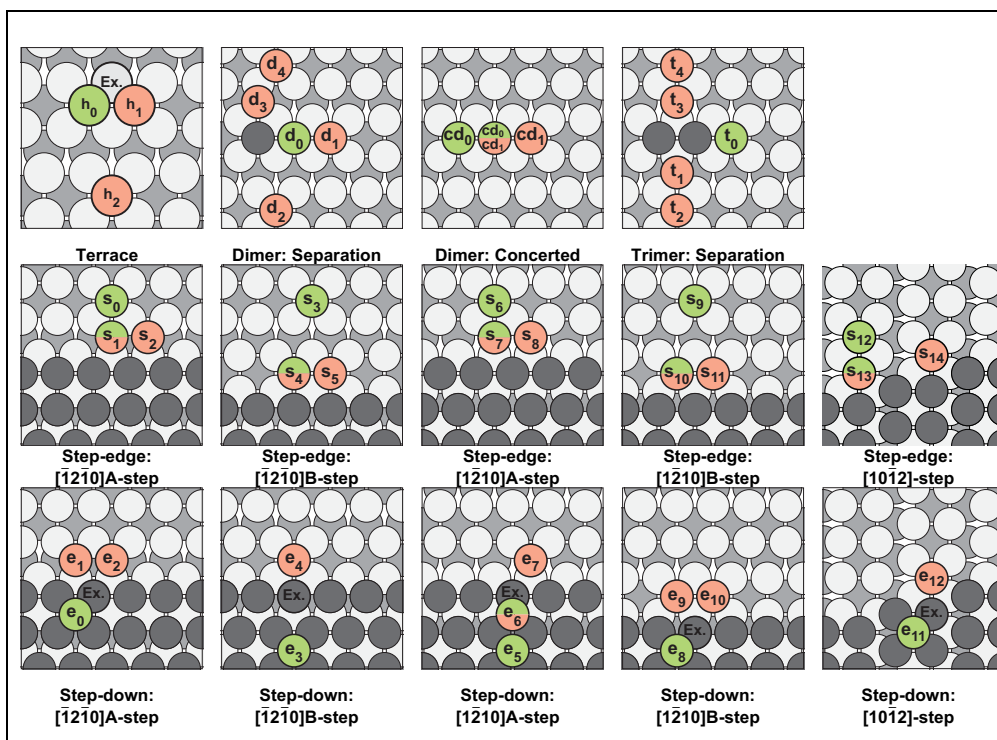

Figure S8. Schematic representation of all investigated diffusion pathways on Mg(10 $\bar{1}$ 1).

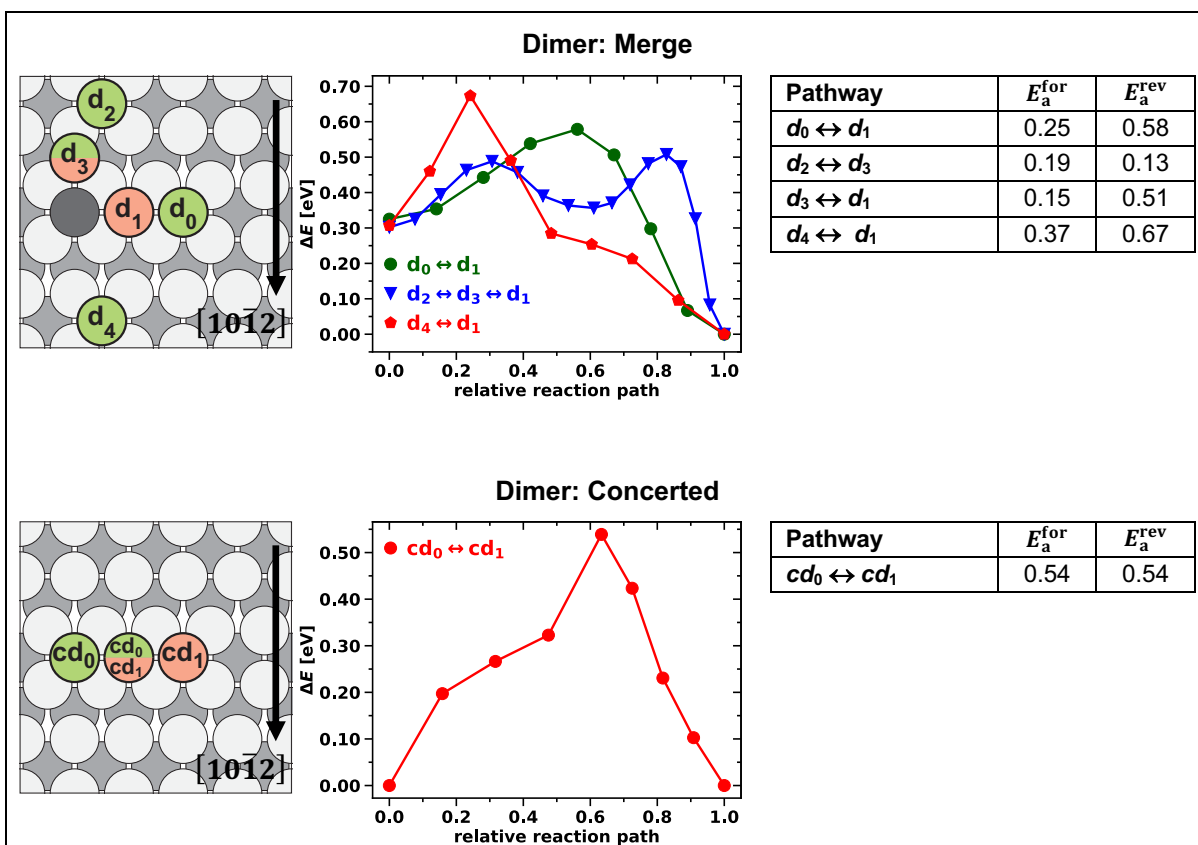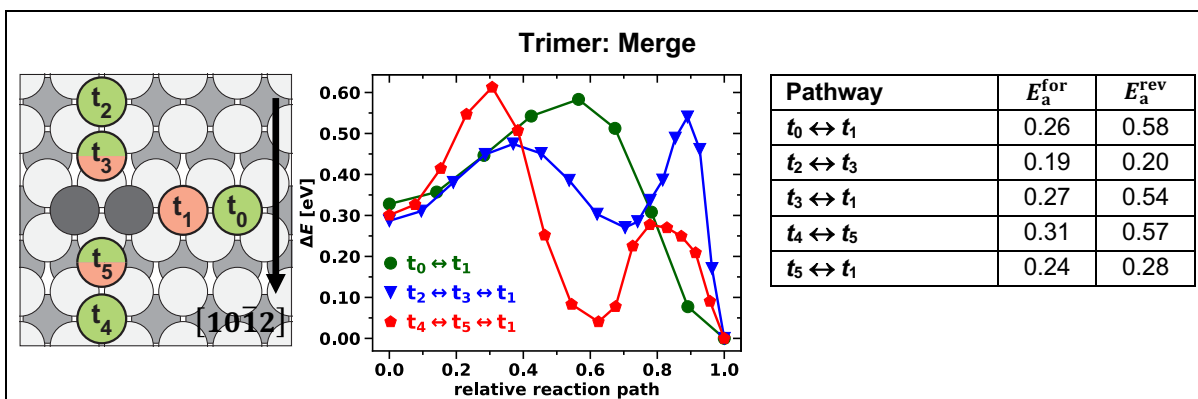

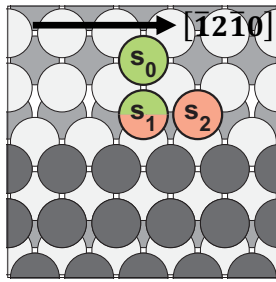

Step-edge:  $[\bar{1}2\bar{1}0]$ A-step

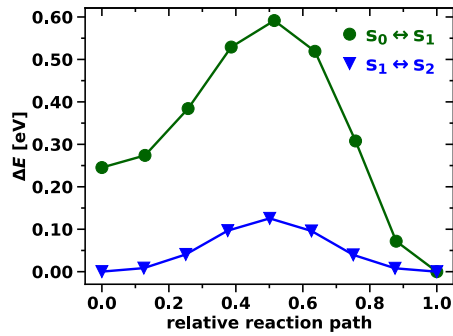

| Pathway                   | $E_a^{\text{for}}$ | $E_a^{\text{rev}}$ |
|---------------------------|--------------------|--------------------|
| $S_0 \leftrightarrow S_1$ | 0.35               | 0.59               |
| $S_1 \leftrightarrow S_2$ | 0.13               | 0.13               |

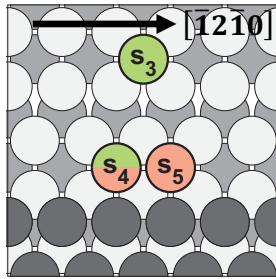

Step-edge:  $[\bar{1}2\bar{1}0]$ B-step

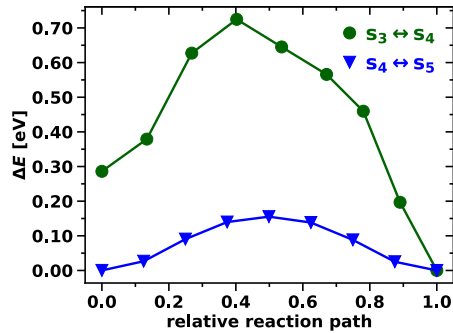

| Pathway                   | $E_a^{\text{for}}$ | $E_a^{\text{rev}}$ |
|---------------------------|--------------------|--------------------|
| $S_3 \leftrightarrow S_4$ | 0.44               | 0.73               |
| $S_4 \leftrightarrow S_5$ | 0.16               | 0.16               |

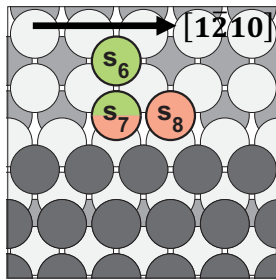

Step-edge:  $[\bar{1}2\bar{1}0]$ A-step

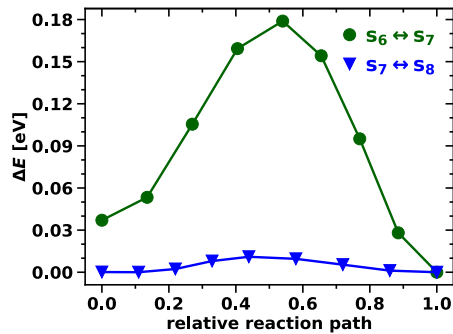

| Pathway                   | $E_a^{\text{for}}$ | $E_a^{\text{rev}}$ |
|---------------------------|--------------------|--------------------|
| $S_6 \leftrightarrow S_7$ | 0.14               | 0.18               |
| $S_7 \leftrightarrow S_8$ | 0.01               | 0.01               |

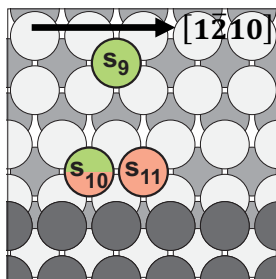

Step-edge:  $[\bar{1}2\bar{1}0]$ B-step

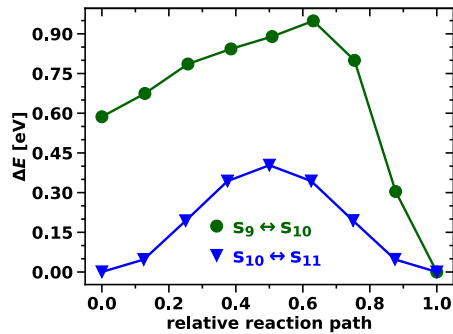

| Pathway                         | $E_a^{\text{for}}$ | $E_a^{\text{rev}}$ |
|---------------------------------|--------------------|--------------------|
| $S_9 \leftrightarrow S_{10}$    | 0.36               | 0.95               |
| $S_{10} \leftrightarrow S_{11}$ | 0.40               | 0.40               |

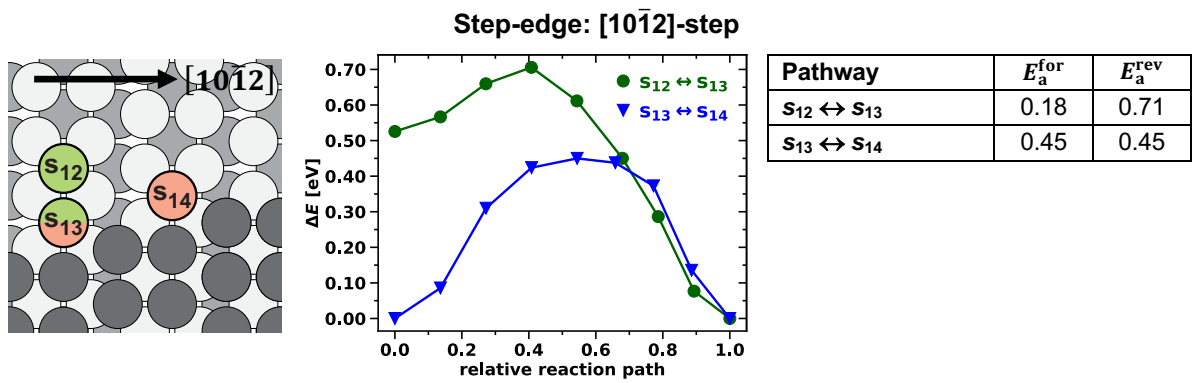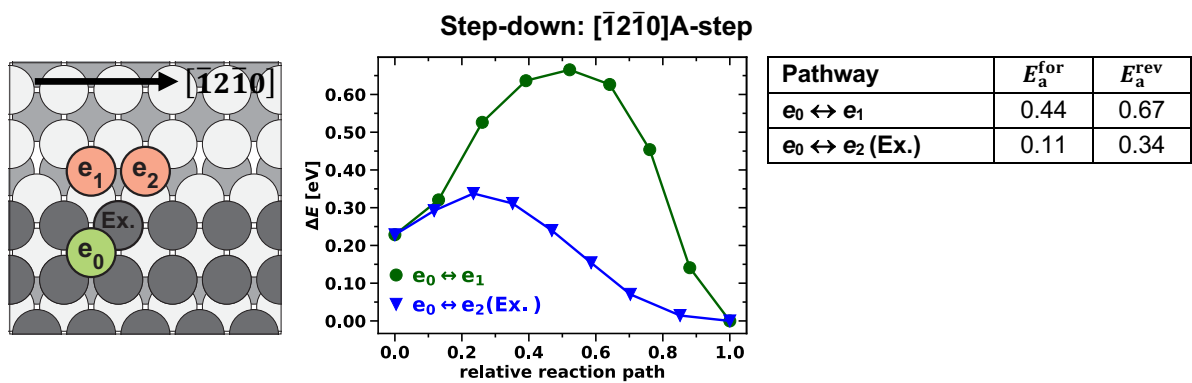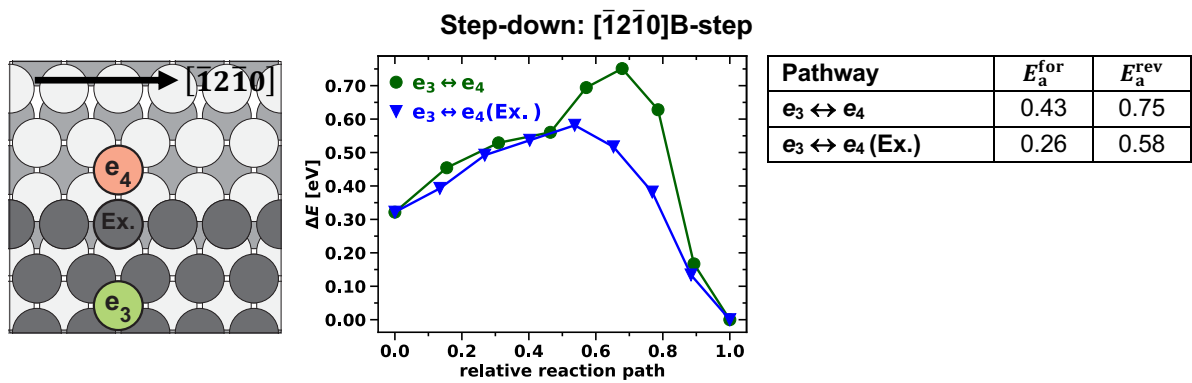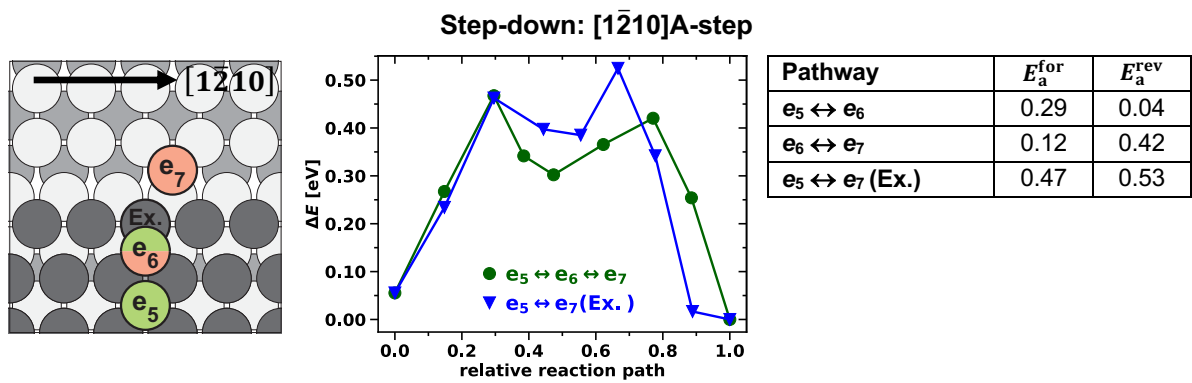

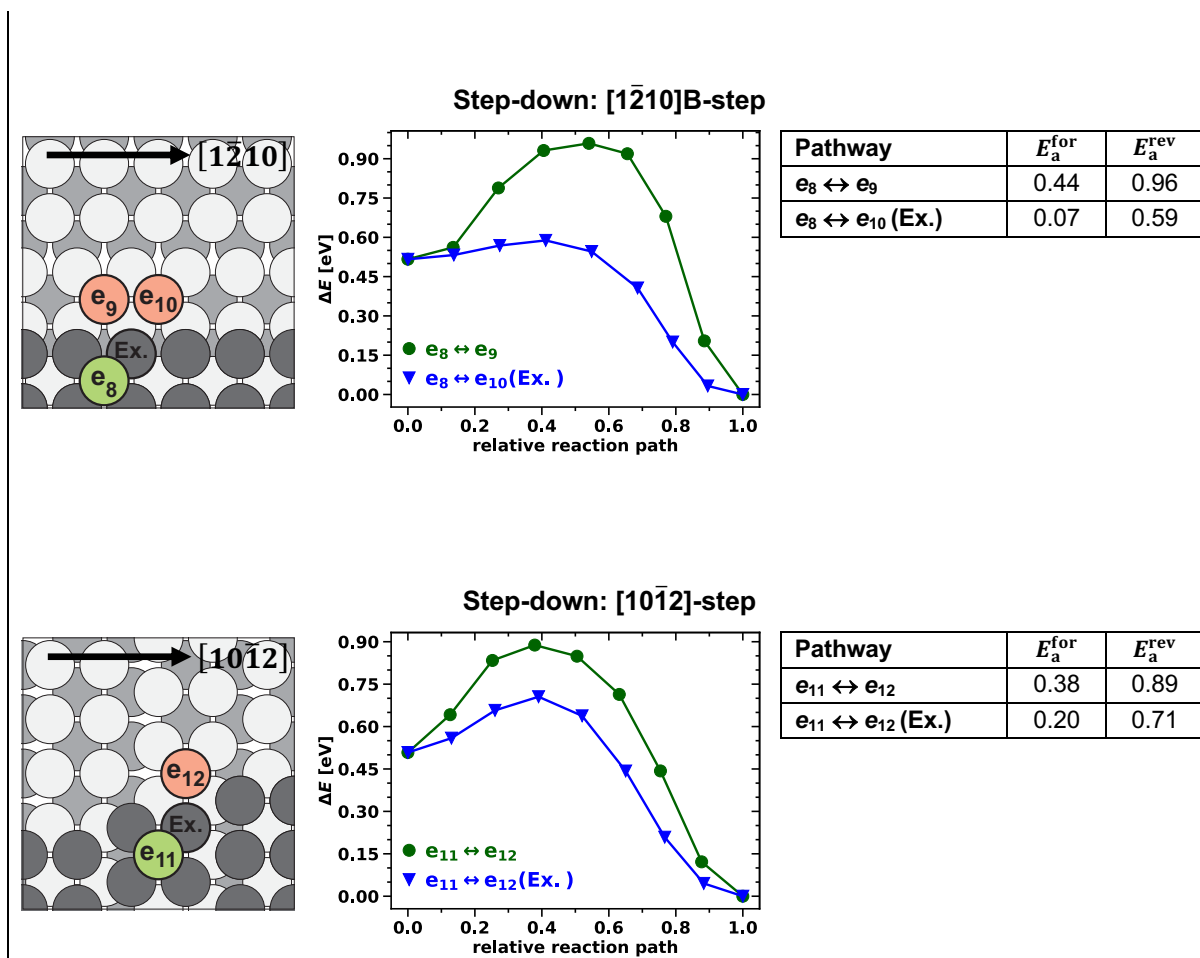

Figure S9. Schematic representation, energy profile and PBE activation energies  $E_a$  of self-diffusion processes studied on Mg(10 $\bar{1}$ 1). Green-colored atoms mark the initial, while red-colored atoms mark the final positions. The values are given in eV.

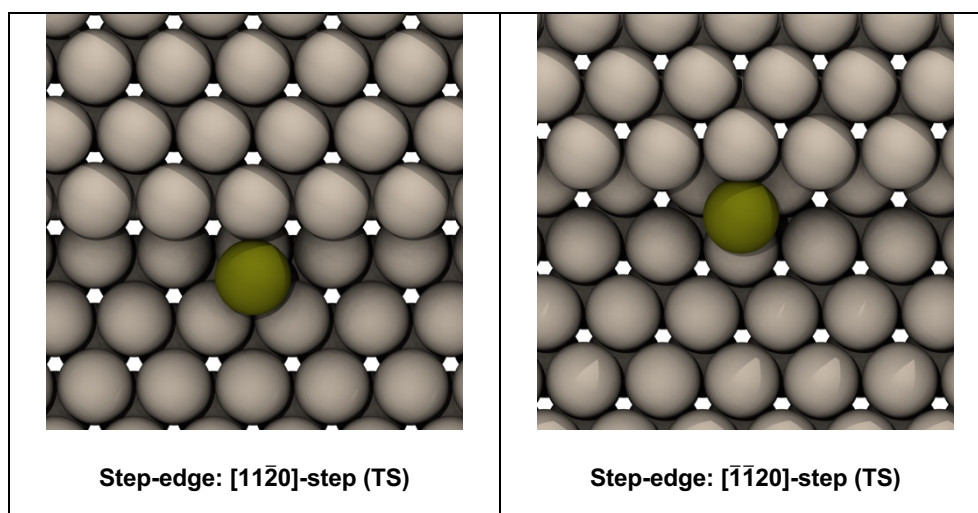

Figure S10. Transition states of step-edge diffusion pathways along  $[11\bar{2}0]$ - and  $[\bar{1}\bar{1}20]$ -steps. In the TS of the  $[\bar{1}\bar{1}20]$ -step, the nearest neighbor atom in the edge row pulls slightly back, leaving a pocket for the diffusing atom (green) to settle in a stabilized fcc-like position.

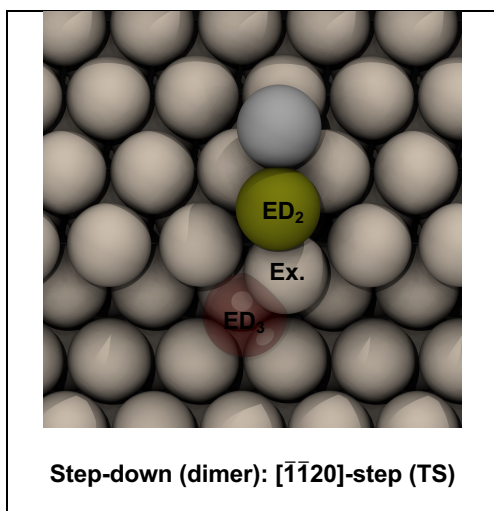

**Figure S11.** Transition state of step-down (dimer) diffusion pathway along the  $[\bar{1}\bar{1}20]$ -step. The second atom (gray) follows the diffusing atom (green) into the *fcc* position above the exchange atom. This maintains the dimer conformation until beyond the TS and lowers the activation energy of the process.

## References

- [1] J. A. Moriarty, A. K. McMahan, *Phys. Rev. Lett.* **1982**, *48*, 809–812.
- [2] A. K. McMahan, J. A. Moriarty, *Phys. Rev. B* **1983**, *27*, 3235–3251.
- [3] J. A. Moriarty, J. D. Althoff, *Phys. Rev. B* **1995**, *51*, 5609–5616.
- [4] H. Olijnyk, W. B. Holzapfel, *Phys. Rev. B* **1985**, *31*, 4682–4683.
- [5] D. Errandonea, Y. Meng, D. Husermann, T. Uchida, *J. Phys.: Condens. Matter* **2003**, *15*, 1277–1289.
- [6] G. W. Stinton, S. G. MacLeod, H. Cynn, D. Errandonea, W. J. Evans, J. E. Proctor, Y. Meng, M. I. McMahon, *Phys. Rev. B* **2014**, *90*, 134105.
- [7] C. Kittel, *Introduction to Solid State Physics, 8th ed.*, John Wiley & Sons, New York, **2004**.
- [8] A. B. Alchagirov, J. P. Perdew, J. C. Boettger, R. C. Albers, C. Fiolhais, *Phys. Rev. B* **2001**, *63*, 224115.
- [9] A. Kopač Lautar, D. Kopač, T. Rejec, T. Bančič, R. Dominko, *Phys. Chem. Chem. Phys.* **2019**, *21*, 2434–2442.
- [10] M. Jäckle, A. Groß, *J. Chem. Phys.* **2014**, *141*, 174710.
- [11] D. Stottmeister, A. Groß, *ChemSusChem* **2020**, *13*, 3147–3153.
- [12] M. Alcántara Ortigoza, M. Aminpour, T. S. Rahman, *Surf. Sci.* **2015**, *632*, 14–19.
- [13] E. Wachowicz, A. Kiejna, *J. Phys.: Condens. Matter* **2001**, *13*, 10767–10776.
- [14] D. P. Ji, Q. Zhu, S. Q. Wang, *Surf. Sci.* **2016**, *651*, 137–146.
- [15] J.-J. Tang, X.-B. Yang, L. OuYang, M. Zhu, Y.-J. Zhao, *J. Phys. D: Appl. Phys.* **2014**, *47*, 115305.
- [16] I. T. Røe, S. M. Selbach, S. K. Schnell, *J. Phys. Chem. Lett.* **2020**, 2891–2895.
- [17] A. B. Alchagirov, J. P. Perdew, J. C. Boettger, R. C. Albers, C. Fiolhais, *Phys. Rev. B* **2003**, *67*, 026103.
- [18] R. Tran, Z. Xu, B. Radhakrishnan, D. Winston, W. Sun, K. A. Persson, S. P. Ong, *Sci. Data* **2016**, *3*, 160080.
- [19] C. G. Johansen, H. Huang, T. M. Lu, *Comput. Mater. Sci.* **2009**, *47*, 121–127.
- [20] B. J. Keene, *Int. Mater. Rev.* **1993**, *38*, 157–192.
- [21] X.-Y. Liu, J. B. Adams, F. Ercolessi, J. A. Moriarty, *Modell. Simul. Mater. Sci. Eng.* **1996**, *4*, 293–303.
- [22] D. Y. Sun, M. I. Mendeleev, C. A. Becker, K. Kudin, T. Haxhimali, M. Asta, J. J. Hoyt, A. Karma, D. J. Srolovitz, *Phys. Rev. B* **2006**, *73*, 024116.
- [23] M. Alcántara Ortigoza, M. Aminpour, T. S. Rahman, *Phys. Rev. B* **2015**, *91*, 115401.
